# Supplementary material for: Metabolic Signatures of 10 Processed and Non-processed Meat Products after In Vitro Digestion
Source: MDPI journal article supplement (doi:10.3390/metabo10070272), 2020-07-03
Supplement: s1 [file s1]

# In vitro digests of meat products reveal specific metabolic signature of processed meat products in an untargeted metabolomics analysis

Roland Wedekind<sup>1</sup>, Pekka Keski-Rahkonen<sup>1</sup>, Nivonirina Robinot<sup>1</sup>, Frederic Mercier<sup>2</sup>, Erwan Engel<sup>2</sup>, Inge Huybrechts<sup>1</sup> and Augustin Scalbert<sup>1,\*</sup>

<sup>1</sup> Nutrition and Metabolism Section, International Agency for Research on Cancer, Lyon, France

<sup>2</sup> Micro-contaminants, Aroma and Separation Sciences (MASS) Group, National Research Institute for Agriculture, Food and Environment (INRAE) UR370 QuaPA, Saint-Genès-Champagnelle, France

\* Correspondence: scalberta@iarc.fr

TABLE S1: See excel sheet

TABLE S2: Metabolic features with significantly higher levels in processed meat digests compared to non-processed pork and beef digests..... 2

TABLE S3 : Features significantly elevated in processed meat digests compared to non-processed meat products and found in pepper extracts..... 12

TABLE S4 : Details on the recursive feature finding used to create the feature table from the HRMS raw data. .... 14

FIGURE S1 : Annotation evidence for Pellirionine in fried sausage digest ..... 15

FIGURE S2 : Annotation evidence for Piperidine ..... 16

FIGURE S3 : Annotation evidence for Piperazine ..... 17

FIGURE S4 : Annotation evidence for Piperine ..... 18

FIGURE S5 : Annotation evidence for Piperettine ..... 19

FIGURE S6 : Annotation evidence for Piperdardine..... 20

FIGURE S7 : Annotation evidence for pepper compound 2..... 21

FIGURE S8 : Annotation evidence for pepper compound 3..... 22

FIGURE S9 : Annotation evidence for pepper compound 4..... 23

FIGURE S10 : Annotation evidence for pepper compound 5..... 24

FIGURE S11 : Annotation evidence for pepper compound 6..... 25

FIGURE S12 : Annotation evidence for pepper compound 7..... 26

FIGURE S13 : Annotation evidence for pepper compound 8..... 27

FIGURE S14 : Annotation evidence for piperidine ..... 28

FIGURE S15 : Annotation evidence for phenylalanylisoleucine..... 29

FIGURE S16 : Annotation evidence for  $\gamma$ -aminobutyric acid..... 30

FIGURE S17 : Annotation evidence for histamine in fermented sausage digest ..... 31

FIGURE S18: Annotation evidence for tyramine ..... 32

FIGURE S19 : Annotation evidence for tryptamine in fermented sausage digest ..... 33

References..... 34

TABLE S2: Metabolic features with significantly higher levels in processed meat digests compared to non-processed pork and beef digests. A Welch's t-test revealed 178 metabolic features that were significantly (FDR-adjusted p-value <0.05) and with at least 2-fold increase in processed meat products (n = 63) compared to non-processed pork and beef (n = 36).

| m/z      | RT   | FDR-adjusted<br>p-value | Fold-<br>change <sup>a</sup> | Cluster <sup>b</sup> | Adduct              | HMDB ID <sup>c</sup> | Annotation                      | Annotation level<br>of confidence <sup>d</sup> |
|----------|------|-------------------------|------------------------------|----------------------|---------------------|----------------------|---------------------------------|------------------------------------------------|
| 359.2448 | 7.13 | 3.71E-06                | 2.31                         | 1                    |                     |                      |                                 |                                                |
| 523.3828 | 7.14 | 2.35E-06                | 2.77                         | 1                    |                     |                      |                                 |                                                |
| 241.1416 | 5.48 | 0.000339                | 2.10                         | 1                    |                     |                      |                                 |                                                |
| 265.1778 | 6.66 | 0.00011                 | 2.24                         | 1                    |                     |                      |                                 |                                                |
| 570.8279 | 4.92 | 2.35E-06                | 2.01                         | 1                    |                     |                      |                                 |                                                |
| 669.3921 | 3.93 | 2.33E-06                | 2.19                         | 1                    |                     |                      |                                 |                                                |
| 581.317  | 4.92 | 9.77E-07                | 2.26                         | 1                    |                     |                      |                                 |                                                |
| 631.4697 | 9.75 | 3.36E-06                | 2.19                         | 1                    |                     |                      |                                 |                                                |
| 652.5865 | 9.75 | 6.41E-06                | 2.22                         | 1                    |                     |                      |                                 |                                                |
| 685.5394 | 7.87 | 0.000228                | 2.04                         | 1                    |                     |                      |                                 |                                                |
| 522.8854 | 7.13 | 9.28E-05                | 2.04                         | 1                    |                     |                      |                                 |                                                |
| 575.502  | 9.75 | 1.01E-05                | 2.27                         | 1                    |                     |                      |                                 |                                                |
| 531.4017 | 8.15 | 0.000601                | 2.03                         | 1                    | [M+Na] <sup>+</sup> | HMDB0007038          | Unknown 1: Possibly diglyceride | 4                                              |

## Online supporting material

|          |      |          |      |   |                     |             |                                           |   |
|----------|------|----------|------|---|---------------------|-------------|-------------------------------------------|---|
| 347.2192 | 6.69 | 0.000182 | 2.14 | 1 |                     |             |                                           |   |
| 353.2662 | 7.26 | 0.007331 | 2.21 | 1 | [M+Na] <sup>+</sup> | HMDB0011533 | <b>Unknown 2:</b> Possibly monoglyceride  | 4 |
| 302.1623 | 5.92 | 0.002954 | 2.34 | 1 |                     |             |                                           |   |
| 325.2363 | 6.18 | 0.002154 | 2.03 | 1 | [M+Na] <sup>+</sup> | HMDB0011530 | <b>Unknown 3:</b> Possibly monoglyceride  | 4 |
| 793.5126 | 7.04 | 0.000432 | 2.12 | 1 |                     |             |                                           |   |
| 811.4872 | 7.04 | 0.002099 | 2.06 | 1 |                     |             |                                           |   |
| 337.272  | 9.75 | 0.000136 | 2.72 | 1 |                     |             |                                           |   |
| 263.2366 | 7.78 | 0.000116 | 2.77 | 1 |                     |             |                                           |   |
| 608.524  | 9.30 | 0.013896 | 2.17 | 1 |                     |             |                                           |   |
| 364.254  | 6.92 | 0.001657 | 2.57 | 1 |                     |             |                                           |   |
| 361.1687 | 6.76 | 0.002712 | 2.19 | 1 |                     |             |                                           |   |
| 271.2271 | 6.48 | 0.000799 | 3.45 | 1 |                     |             |                                           |   |
| 312.2536 | 6.69 | 0.018251 | 2.09 | 1 |                     |             |                                           |   |
| 615.4575 | 6.75 | 0.005894 | 2.18 | 1 |                     |             |                                           |   |
| 317.1556 | 6.12 | 0.016059 | 2.08 | 1 |                     |             |                                           |   |
| 409.2028 | 7.78 | 0.004203 | 2.43 | 1 |                     |             |                                           |   |
| 315.1643 | 6.12 | 0.006405 | 2.12 | 1 |                     |             |                                           |   |
| 421.2532 | 7.21 | 0.002053 | 2.93 | 1 |                     |             |                                           |   |
| 353.2669 | 7.68 | 0.019551 | 2.30 | 1 | [M+Na] <sup>+</sup> | HMDB0011533 | <b>Unknown 4 :</b> Possible monoglyceride | 4 |

Online supporting material

|          |      |          |        |   |                    |             |                          |   |
|----------|------|----------|--------|---|--------------------|-------------|--------------------------|---|
| 369.2406 | 7.18 | 0.01056  | 2.07   | 1 |                    |             |                          |   |
| 279.1712 | 3.36 | 0.015885 | 3.13   | 2 | [M+H] <sup>+</sup> | HMDB0028998 | <b>Phe-Ile dipeptide</b> | 2 |
| 245.1381 | 4.32 | 0.019551 | 2.34   | 2 |                    |             |                          |   |
| 523.383  | 7.17 | 0.007815 | 3.80   | 2 |                    |             |                          |   |
| 524.3847 | 7.17 | 1.65E-05 | 501.94 | 2 |                    |             |                          |   |
| 332.2184 | 3.63 | 0.02459  | 3.50   | 2 |                    |             |                          |   |
| 360.2896 | 6.78 | 0.01454  | 4.36   | 2 |                    |             |                          |   |
| 145.0496 | 0.86 | 3.67E-05 | 415.11 | 2 |                    |             |                          |   |
| 244.9731 | 1.86 | 0.00029  | 14.42  | 2 |                    |             |                          |   |
| 285.1313 | 4.17 | 0.000112 | 327.15 | 2 |                    |             |                          |   |
| 261.0284 | 1.86 | 0.000513 | 306.60 | 2 |                    |             |                          |   |
| 336.1922 | 3.22 | 0.000807 | 295.48 | 2 |                    |             |                          |   |
| 127.0383 | 3.03 | 0.001373 | 262.82 | 2 |                    |             |                          |   |
| 167.0312 | 1.53 | 0.004018 | 216.55 | 2 |                    |             |                          |   |
| 379.2782 | 7.04 | 0.000233 | 2.89   | 3 |                    |             |                          |   |
| 280.2356 | 6.72 | 0.010854 | 2.06   | 3 |                    |             |                          |   |
| 365.2294 | 6.18 | 0.000737 | 2.56   | 3 |                    |             |                          |   |
| 260.1949 | 0.85 | 0.000147 | 3.53   | 3 |                    |             |                          |   |
| 581.8191 | 4.92 | 2.35E-06 | 2.48   | 3 |                    |             |                          |   |

Online supporting material

|          |      |          |       |   |                     |             |                                                 |   |
|----------|------|----------|-------|---|---------------------|-------------|-------------------------------------------------|---|
| 615.349  | 3.76 | 8.40E-05 | 2.70  | 3 |                     |             |                                                 |   |
| 213.1105 | 4.45 | 2.94E-08 | 7.23  | 3 |                     |             |                                                 |   |
| 172.0058 | 3.07 | 6.93E-06 | 2.69  | 3 |                     |             |                                                 |   |
| 130.0323 | 2.42 | 8.12E-05 | 2.71  | 3 |                     |             |                                                 |   |
| 176.0364 | 0.89 | 1.73E-06 | 3.35  | 3 |                     |             |                                                 |   |
| 539.319  | 6.91 | 5.74E-05 | 4.34  | 3 |                     |             |                                                 |   |
| 637.4798 | 8.99 | 7.39E-05 | 3.10  | 3 |                     |             |                                                 |   |
| 632.5247 | 8.99 | 2.17E-06 | 3.93  | 3 |                     |             |                                                 |   |
| 217.0851 | 5.22 | 5.29E-05 | 5.03  | 3 |                     |             |                                                 |   |
| 402.2352 | 3.30 | 1.86E-05 | 5.67  | 3 |                     |             |                                                 |   |
| 754.4483 | 4.62 | 7.64E-07 | 9.90  | 4 |                     |             |                                                 |   |
| 308.1262 | 6.01 | 3.66E-05 | 3.80  | 4 | [M+Na] <sup>+</sup> | HMDB0029377 | <b>Piperine</b>                                 | 1 |
| 393.3841 | 7.34 | 7.94E-05 | 2.52  | 4 |                     |             |                                                 |   |
| 345.2181 | 5.99 | 9.03E-08 | 8.61  | 4 |                     |             |                                                 |   |
| 272.1287 | 5.74 | 7.35E-05 | 3.47  | 4 | [M+H] <sup>+</sup>  | HMDB0029374 | <b>Piperyline</b>                               | 2 |
| 312.1597 | 6.29 | 6.85E-07 | 10.83 | 4 | [M+H] <sup>+</sup>  | HMDB0034371 | <b>Piperettine</b>                              | 2 |
| 288.1601 | 5.93 | 7.99E-08 | 13.03 | 4 | [M+H] <sup>+</sup>  | HMDB0033874 | <b>Piperanine</b>                               | 2 |
| 340.1909 | 6.57 | 0.000624 | 3.09  | 4 | [M+H] <sup>+</sup>  | HMDB0040811 | <b>Dehydropipernonaline (Pepper compound 5)</b> | 3 |
| 344.2236 | 6.78 | 4.43E-06 | 7.17  | 4 | [M+H] <sup>+</sup>  | HMDB0030340 | <b>Piperolein B (Pepper compound 7)</b>         | 3 |

# Online supporting material

|          |      |          |        |   |                     |                           |                                              |   |
|----------|------|----------|--------|---|---------------------|---------------------------|----------------------------------------------|---|
| 403.2953 | 6.78 | 6.71E-09 | 681.21 | 4 |                     |                           |                                              |   |
| 347.2317 | 5.93 | 2.29E-08 | 29.92  | 4 |                     |                           |                                              |   |
| 224.2012 | 6.36 | 4.79E-07 | 12.10  | 4 | [M+H] <sup>+</sup>  | HMDB0030951               | <b>Pellitorine</b>                           | 1 |
| 722.3292 | 6.01 | 1.50E-08 | 628.89 | 4 |                     |                           |                                              |   |
| 700.3479 | 6.02 | 1.55E-08 | 601.29 | 4 |                     |                           |                                              |   |
| 314.1751 | 6.28 | 1.61E-07 | 23.66  | 4 |                     |                           |                                              |   |
| 371.2331 | 6.28 | 3.46E-08 | 686.62 | 4 |                     |                           | <b>Compound in pepper</b>                    | 3 |
| 331.2016 | 5.74 | 3.46E-08 | 606.90 | 4 |                     |                           |                                              |   |
| 316.192  | 6.41 | 1.52E-07 | 586.71 | 4 | [M+H] <sup>+</sup>  | HMDB0030185               | <b>(E)-Piperolein A (Pepper compound 1)</b>  | 3 |
| 310.1422 | 5.93 | 1.58E-07 | 554.04 | 4 | [M+Na] <sup>+</sup> | HMDB0033874               | <b>Piperanine, also as [M+H]<sup>+</sup></b> | 2 |
| 755.4229 | 5.98 | 6.85E-07 | 23.03  | 4 |                     |                           |                                              |   |
| 334.1411 | 6.28 | 2.08E-06 | 20.10  | 4 | [M+Na] <sup>+</sup> | HMDB0034371               | <b>Piperettine</b>                           | 2 |
| 285.1363 | 5.99 | 6.47E-07 | 524.09 | 4 | [M+Na] <sup>+</sup> |                           | Comp from pepper                             | 3 |
| 314.1394 | 4.46 | 7.49E-08 | 607.34 | 4 | [M+H] <sup>+</sup>  | PubChem CID :<br>10086948 | <b>Piperdardine</b>                          | 3 |
| 362.3409 | 7.60 | 3.69E-07 | 531.77 | 4 | [M+H] <sup>+</sup>  | HMDB0032032               | 2,4,14-Eicosatrienoic acid isobutylamide     | 3 |
| 421.4146 | 7.60 | 2.32E-07 | 23.64  | 4 |                     |                           |                                              |   |
| 406.2351 | 6.97 | 0.001903 | 2.35   | 4 | [M+Na] <sup>+</sup> | HMDB0030186               | (E,E,E)-Sylvatine                            | 3 |
| 593.2622 | 5.98 | 5.65E-05 | 4.37   | 4 | [M+Na] <sup>+</sup> | HMDB0036360               | Pipercyclobutanamide A                       | 3 |
| 401.2776 | 6.67 | 0.001417 | 3.91   | 4 |                     |                           |                                              |   |

# Online supporting material

|          |      |          |        |   |                     |             |                                                       |   |
|----------|------|----------|--------|---|---------------------|-------------|-------------------------------------------------------|---|
| 274.1444 | 5.79 | 5.35E-06 | 443.90 | 4 | [M+H] <sup>+</sup>  | HMDB0030187 | Pepper compound                                       | 4 |
| 330.2072 | 6.62 | 1.26E-06 | 494.56 | 4 | [M+H] <sup>+</sup>  | HMDB0039808 | <b>Pipertipine (Pepper compound 4)</b>                | 3 |
| 366.2044 | 6.78 | 2.54E-06 | 472.13 | 4 | [M+Na] <sup>+</sup> | HMDB0030340 | <b>Piperolein B (Pepper compound 7)</b>               | 3 |
| 399.2626 | 6.56 | 4.70E-06 | 454.50 | 4 |                     |             |                                                       |   |
| 326.1768 | 6.40 | 4.97E-06 | 437.90 | 4 | [M+H] <sup>+</sup>  | HMDB0038644 | <b>(2E,4E,8E)-Piperamide-C9:3 (Pepper compound 2)</b> | 3 |
| 328.1913 | 6.38 | 2.56E-06 | 442.84 | 4 | [M+H] <sup>+</sup>  | HMDB0038645 | <b>(2E,8E)-Piperamide-C9:2 (Pepper compound 3)</b>    | 3 |
| 356.222  | 6.70 | 9.28E-06 | 421.51 | 4 | [M+H] <sup>+</sup>  | HMDB0033449 | <b>Pipercide</b>                                      | 2 |
| 389.2802 | 6.61 | 1.71E-05 | 405.30 | 4 |                     |             |                                                       |   |
| 443.3264 | 6.97 | 1.78E-05 | 402.80 | 4 |                     |             |                                                       |   |
| 342.2088 | 6.67 | 0.000208 | 11.43  | 4 | [M+H] <sup>+</sup>  | HMDB0030339 | <b>Pipernonaline (Pepper compound 6)</b>              | 2 |
| 337.2684 | 7.68 | 0.00142  | 2.64   | 5 |                     |             |                                                       |   |
| 436.285  | 7.25 | 0.015124 | 2.53   | 5 |                     |             |                                                       |   |
| 328.25   | 6.47 | 0.019999 | 2.95   | 5 |                     |             |                                                       |   |
| 185.0753 | 3.45 | 0.000652 | 14.15  | 5 |                     |             |                                                       |   |
| 362.3153 | 6.74 | 0.023118 | 7.40   | 5 |                     |             |                                                       |   |
| 311.2942 | 7.23 | 0.022502 | 2.45   | 5 |                     |             |                                                       |   |
| 651.424  | 6.76 | 0.000425 | 2.93   | 5 |                     |             |                                                       |   |
| 193.1585 | 6.75 | 0.002837 | 2.72   | 5 |                     |             |                                                       |   |
| 225.1845 | 6.75 | 0.003458 | 3.54   | 5 |                     |             |                                                       |   |

## Online supporting material

|          |      |          |        |   |                    |             |                                           |   |
|----------|------|----------|--------|---|--------------------|-------------|-------------------------------------------|---|
| 179.1432 | 6.75 | 0.00031  | 3.39   | 5 |                    |             |                                           |   |
| 171.1382 | 6.75 | 0.001009 | 3.96   | 5 |                    |             |                                           |   |
| 341.2684 | 7.14 | 0.001067 | 3.51   | 5 |                    |             |                                           |   |
| 617.5135 | 9.38 | 0.003503 | 3.14   | 5 | [M+H] <sup>+</sup> | HMDB0007112 | <b>Unknown 5</b> : Possibly diglyceride   | 4 |
| 676.5864 | 9.38 | 0.033529 | 2.20   | 5 |                    |             |                                           |   |
| 693.5442 | 7.67 | 0.002254 | 4.21   | 5 | [M+H] <sup>+</sup> | HMDB0007776 | <b>Unknown 6</b> : Possibly diglyceride   | 4 |
| 721.047  | 7.04 | 0.031479 | 2.56   | 5 |                    |             |                                           |   |
| 869.5439 | 7.03 | 0.03205  | 2.80   | 5 |                    |             |                                           |   |
| 273.2595 | 7.27 | 0.035203 | 2.80   | 5 |                    |             |                                           |   |
| 391.2467 | 6.45 | 0.021811 | 3.39   | 5 |                    |             |                                           |   |
| 655.4702 | 9.38 | 0.000152 | 7.60   | 5 | [M+H] <sup>+</sup> | HMDB0112171 | <b>Unknown 7</b> : Possibly lipid         | 4 |
| 351.2534 | 6.44 | 0.00908  | 7.40   | 5 | [M+H] <sup>+</sup> | HMDB0011541 | <b>Unknown 8</b> : Possibly monoglyceride | 4 |
| 291.1935 | 6.52 | 9.83E-05 | 402.30 | 5 |                    |             |                                           |   |
| 269.2103 | 6.52 | 0.00286  | 8.77   | 5 |                    |             |                                           |   |
| 635.4554 | 6.75 | 0.000198 | 316.28 | 5 |                    |             |                                           |   |
| 619.4827 | 6.76 | 0.000194 | 310.22 | 5 |                    |             |                                           |   |
| 384.1969 | 6.76 | 0.033007 | 2.43   | 5 |                    |             |                                           |   |
| 231.1    | 5.67 | 0.00119  | 12.83  | 5 |                    |             |                                           |   |
| 175.0271 | 1.62 | 0.021831 | 2.93   | 5 |                    |             |                                           |   |



# Online supporting material

|          |      |          |        |   |                     |             |                  |   |
|----------|------|----------|--------|---|---------------------|-------------|------------------|---|
| 654.4484 | 6.89 | 0.014143 | 2.67   | 5 |                     |             |                  |   |
| 124.0394 | 1.08 | 0.002177 | 4.04   | 5 | [M+H] <sup>+</sup>  | HMDB0001488 | nicotinic acid   | 3 |
| 350.1542 | 6.61 | 0.001745 | 3.92   | 5 |                     |             |                  |   |
| 266.9938 | 3.85 | 0.001026 | 7.12   | 5 |                     |             |                  |   |
| 189.0501 | 3.85 | 0.001118 | 12.42  | 5 |                     |             |                  |   |
| 199.1694 | 6.89 | 0.006623 | 195.35 | 5 |                     |             |                  |   |
| 274.0747 | 3.26 | 0.036974 | 4.38   | 5 |                     |             |                  |   |
| 263.2369 | 6.26 | 0.00427  | 211.63 | 5 |                     |             |                  |   |
| 261.0949 | 0.76 | 0.007683 | 175.05 | 5 |                     |             |                  |   |
| 348.2149 | 6.92 | 1.56E-13 | 35.35  | 6 |                     |             |                  |   |
| 343.2605 | 6.92 | 3.68E-08 | 617.52 | 6 |                     |             |                  |   |
| 113.0597 | 2.76 | 0.002122 | 2.70   | 6 |                     |             |                  |   |
| 239.0234 | 4.01 | 0.002993 | 2.46   | 6 |                     |             |                  |   |
| 254.9955 | 4.01 | 3.42E-05 | 3.95   | 6 |                     |             |                  |   |
| 185.0421 | 0.74 | 7.24E-10 | 706.89 | 6 |                     |             |                  |   |
| 127.0388 | 2.65 | 9.68E-06 | 455.62 | 6 |                     |             |                  |   |
| 191.0686 | 4.57 | 1.88E-07 | 643.75 | 6 | [M+Na] <sup>+</sup> | HMDB0029680 | 4-methylsyringol | 1 |
| 197.0089 | 2.77 | 7.46E-08 | 574.52 | 6 |                     |             |                  |   |
| 183.1018 | 5.08 | 0.000111 | 8.28   | 6 | [M+H] <sup>+</sup>  | HMDB0033394 | 4-ethylsyringol  | 1 |

Online supporting material

|          |      |          |        |   |                     |             |                         |   |
|----------|------|----------|--------|---|---------------------|-------------|-------------------------|---|
| 169.086  | 4.57 | 5.34E-06 | 23.07  | 6 | [M+H] <sup>+</sup>  | HMDB0029680 | <b>4-methylsyringol</b> | 1 |
| 205.0841 | 5.08 | 3.20E-06 | 513.53 | 6 | [M+Na] <sup>+</sup> | HMDB0033394 | <b>4-ethylsyringol</b>  | 1 |
| 257.061  | 4.01 | 2.71E-06 | 447.57 | 6 |                     |             |                         |   |
| 269.0107 | 4.57 | 5.43E-06 | 408.09 | 6 |                     |             |                         |   |
| 190.0607 | 4.57 | 5.57E-06 | 409.16 | 6 |                     |             |                         |   |
| 168.0782 | 4.57 | 5.70E-06 | 408.34 | 6 |                     |             |                         |   |
| 268.0026 | 4.57 | 1.02E-05 | 404.13 | 6 |                     |             |                         |   |
| 253.0391 | 4.57 | 1.85E-05 | 395.38 | 6 |                     |             |                         |   |
| 211.0959 | 3.60 | 0.013716 | 2.97   | 6 |                     |             |                         |   |
| 183.0642 | 3.63 | 0.017322 | 3.09   | 6 |                     |             |                         |   |
| 409.2559 | 6.12 | 0.000492 | 260.44 | 6 |                     |             |                         |   |
| 537.3002 | 6.73 | 0.000477 | 268.54 | 6 |                     |             |                         |   |
| 397.3824 | 8.19 | 0.001554 | 175.01 | 6 |                     |             |                         |   |
| 217.0846 | 5.33 | 0.001599 | 282.41 | 6 | [M+Na] <sup>+</sup> | HMDB0037271 | <b>4-allylsyringol</b>  | 1 |
| 219.1001 | 5.54 | 0.025749 | 7.05   | 6 | [M+Na] <sup>+</sup> | HMDB0036226 | <b>4-propylsyringol</b> | 1 |
| 562.2922 | 3.70 | 0.018079 | 5.37   | 6 |                     |             |                         |   |
| 627.3506 | 4.23 | 0.035012 | 7.22   | 6 |                     |             |                         |   |
| 445.245  | 4.70 | 0.007605 | 221.20 | 6 |                     |             |                         |   |
| 345.2213 | 4.18 | 0.007582 | 220.80 | 6 |                     |             |                         |   |

## Online supporting material

|          |      |          |        |   |                    |             |                                                   |   |
|----------|------|----------|--------|---|--------------------|-------------|---------------------------------------------------|---|
| 445.7474 | 4.70 | 0.021726 | 10.58  | 6 |                    |             |                                                   |   |
| 456.2355 | 4.70 | 0.043219 | 7.68   | 6 |                    |             |                                                   |   |
| 472.2045 | 4.69 | 0.02006  | 159.52 | 6 |                    |             |                                                   |   |
| 607.3806 | 3.63 | 0.012317 | 185.67 | 6 |                    |             |                                                   |   |
| 195.102  | 5.32 | 0.019201 | 178.91 | 6 | [M+H] <sup>+</sup> | HMDB0037271 | <b>4-allylsyringol</b>                            | 1 |
| 197.0813 | 3.84 | 0.049335 | 4.16   | 6 |                    |             |                                                   |   |
| 194.0948 | 5.33 | 0.005164 | 197.66 | 6 |                    |             |                                                   |   |
| 479.2973 | 3.24 | 0.006717 | 194.73 | 6 |                    |             |                                                   |   |
| 271.0771 | 4.57 | 0.011452 | 163.49 | 6 |                    |             |                                                   |   |
| 197.1173 | 5.54 | 0.020426 | 141.68 | 6 | [M+H] <sup>+</sup> | HMDB0036226 | <b>4-propylsyringol, [M+Na]<sup>+</sup> above</b> | 1 |
| 464.2185 | 4.70 | 0.032136 | 142.30 | 6 |                    |             |                                                   |   |
| 216.0774 | 5.33 | 0.032155 | 138.03 | 6 |                    |             |                                                   |   |
| 327.2068 | 3.64 | 0.032156 | 132.57 | 6 |                    |             |                                                   |   |

Abbreviations: RT, Retention time; ppm: parts per million; <sup>a</sup> mean intensity of metabolite in processed meat products divided by mean intensity in non-processed meat products, <sup>b</sup> clusters of metabolites in figure 2, <sup>c</sup> identifier of the Human Metabolome Database ([www.hmdb.ca](http://www.hmdb.ca)), <sup>d</sup> level of confidence as described in Sumner et al. [1]

TABLE S3 : Features significantly elevated in processed meat digests compared to non-processed meat products and found in pepper extracts. Pepper origin of all compounds is confirmed by comparison of MS/MS spectra with corresponding compounds in pepper extracts. Some could be annotated based on comparison with chemical standards or comparison of their MS/MS spectra with those curated in public databases. References are found at the end of the Supplement.

| m/z      | RT <sup>a</sup> (min) | Adjusted p-value <sup>b</sup> | Adduct | Mass accuracy <sup>c</sup> (ppm) | HMDB ID/<br>PubChem CID | Annotation (in brackets annotation in Figure 2)                              | Level of confidence <sup>d</sup> | Detection (Pepper type) | Reference <sup>e</sup> |
|----------|-----------------------|-------------------------------|--------|----------------------------------|-------------------------|------------------------------------------------------------------------------|----------------------------------|-------------------------|------------------------|
| 224.2012 | 6.34                  | 4.79E-07                      | H      | 1                                | HMDB0030951             | Pellitorine                                                                  | 1                                | A <sup>f</sup>          | [2]                    |
| 272.1287 | 5.74                  | 7.35E-05                      | H      | 2                                | HMDB0029374             | Piperyline                                                                   | 2                                | A                       | [3,4]                  |
| 288.1601 | 5.93                  | 7.99E-08                      | H      | 2                                | HMDB0033874             | Piperanine                                                                   | 2                                | A                       | [3–5]                  |
| 308.1262 | 6.01                  | 3.66E-05                      | Na     | 2                                | HMDB0029377             | Piperine                                                                     | 1                                | A                       |                        |
| 312.1597 | 6.29                  | 6.85E-07                      | H      | 1                                | HMDB0034371             | Piperettine                                                                  | 2                                | A                       | [3]                    |
| 314.1751 | 6.28                  | 1.61E-07                      | H      | 0                                | PubChem CID<br>10086948 | Piperdardine                                                                 | 2                                | A                       | [3]                    |
| 316.192  | 6.41                  | 1.52E-07                      | H      | 4                                | HMDB0030185             | (E)-Piperolein A<br>(Pepper compound 1)                                      | 3                                | A                       |                        |
| 326.1768 | 6.40                  | 4.97E-06                      | H      | 5                                | HMDB0038644             | (2E,4E,8E)-Piperamide-C9:3<br>(Pepper compound 2)                            | 3                                | A                       |                        |
| 328.1913 | 6.38                  | 2.56E-06                      | H      | 2                                | HMDB0038645             | (2E,8E)-Piperamide-C9:2<br>(Pepper compound 3)                               | 3                                | A                       |                        |
| 330.2072 | 6.62                  | 1.26E-06                      | H      | 2                                | HMDB0039808             | Pipertipine OR retrofractamide C OR 8E-piperamideC9:1<br>(Pepper compound 4) | 3                                | B, G                    |                        |
| 340.1909 | 6.57                  | 0.000624                      | H      | 0                                | HMDB0040811             | Dehydropipernonaline<br>(Pepper compound 5)                                  | 3                                | A                       |                        |
| 342.2088 | 6.67                  | 0.000208                      | H      | 7                                | HMDB0030339             | Pipernonaline OR Retrofractamide D<br>(Pepper compound 6)                    | 3                                | A                       |                        |
| 344.2236 | 6.78                  | 4.43E-06                      | H      | 5                                | HMDB0030340             | Piperolein B<br>(Pepper compound 7)                                          | 3                                | A                       |                        |
| 356.222  | 6.70                  | 9.28E-06                      | H      | 4                                | HMDB0033449             | Pipercide                                                                    | 2                                | A                       | [4]                    |

<sup>a</sup> RT, Retention time; <sup>b</sup> FDR-adjusted p-value of a Welch's t-test comparing metabolite intensities in processed meat digests to non-processed meat digests; <sup>c</sup> accuracy of measured mass compared to the theoretical mass of the annotation; <sup>d</sup> annotation level of confidence: Identity confirmed by comparison of RT and MS/MS fragmentation pattern with chemical standard (level 1), Annotation based on match of RT and MS/MS fragmentation pattern with compound present in black pepper extract AND matching MSMS fragmentation pattern with literature spectra (level 2), Annotation based on match of RT and MS/MS fragmentation pattern

## Online supporting material

with compound present in black pepper extract (level 3); <sup>e</sup> literature references for MS/MS spectra of pepper compounds: see last page of supplement <sup>f</sup> Detection in extracts of ground pepper (n = 6): A, all (black, white, green); B, G (black, green)

TABLE S4 : Details on the recursive feature finding used to create the feature table from the HRMS raw data. All steps were carried out using the Agilent MassHunter software package (Mass Profiler Professional version B14.9.1, Qualitative Analysis version B06.00 and DA Reprocessor version B.05.00; Agilent technologies).

|                                                 |                                                             |
|-------------------------------------------------|-------------------------------------------------------------|
| <b>First step: Molecular feature extraction</b> |                                                             |
| Mass range                                      | 50-1000 m/z                                                 |
| Peak height threshold                           | 1500 counts                                                 |
| Ions                                            | Limited to [M+H] <sup>+</sup>                               |
| Isotope grouping                                | Common organic molecules (no halogens), single-charged ions |
| Alignment                                       | 15 ppm, +/- 0.1 min                                         |
| <b>Second step: Recursive analysis</b>          |                                                             |
| Creation of targets                             | features detected in at least 3 samples                     |
| Chromatogram extraction                         | +/- 25 ppm and +/- 1.0 min around target                    |
| Alignment of features                           | 15 ppm, +/- 0.1 min                                         |

FIGURE S1 : Annotation evidence for Pellironine in fried sausage digest, comparison with compound in black pepper extract.

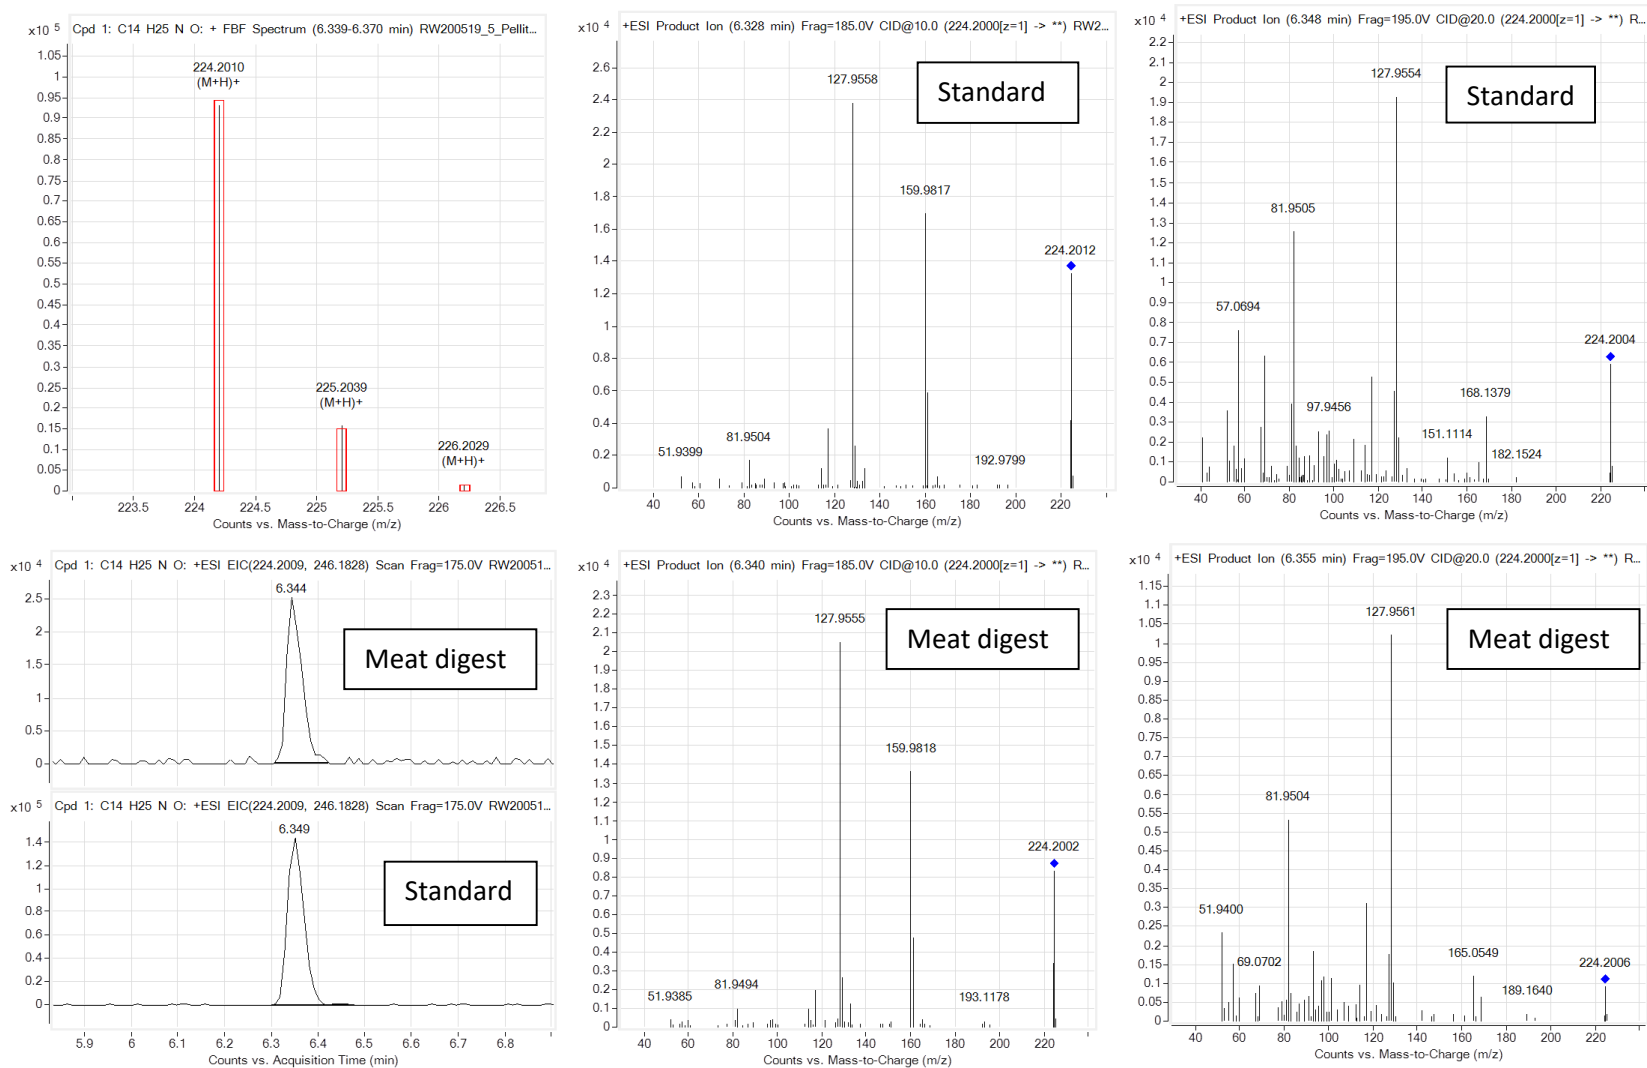

FIGURE S2 : Annotation evidence for Piperine in fried sausage digest, comparison with compound in black pepper extract.

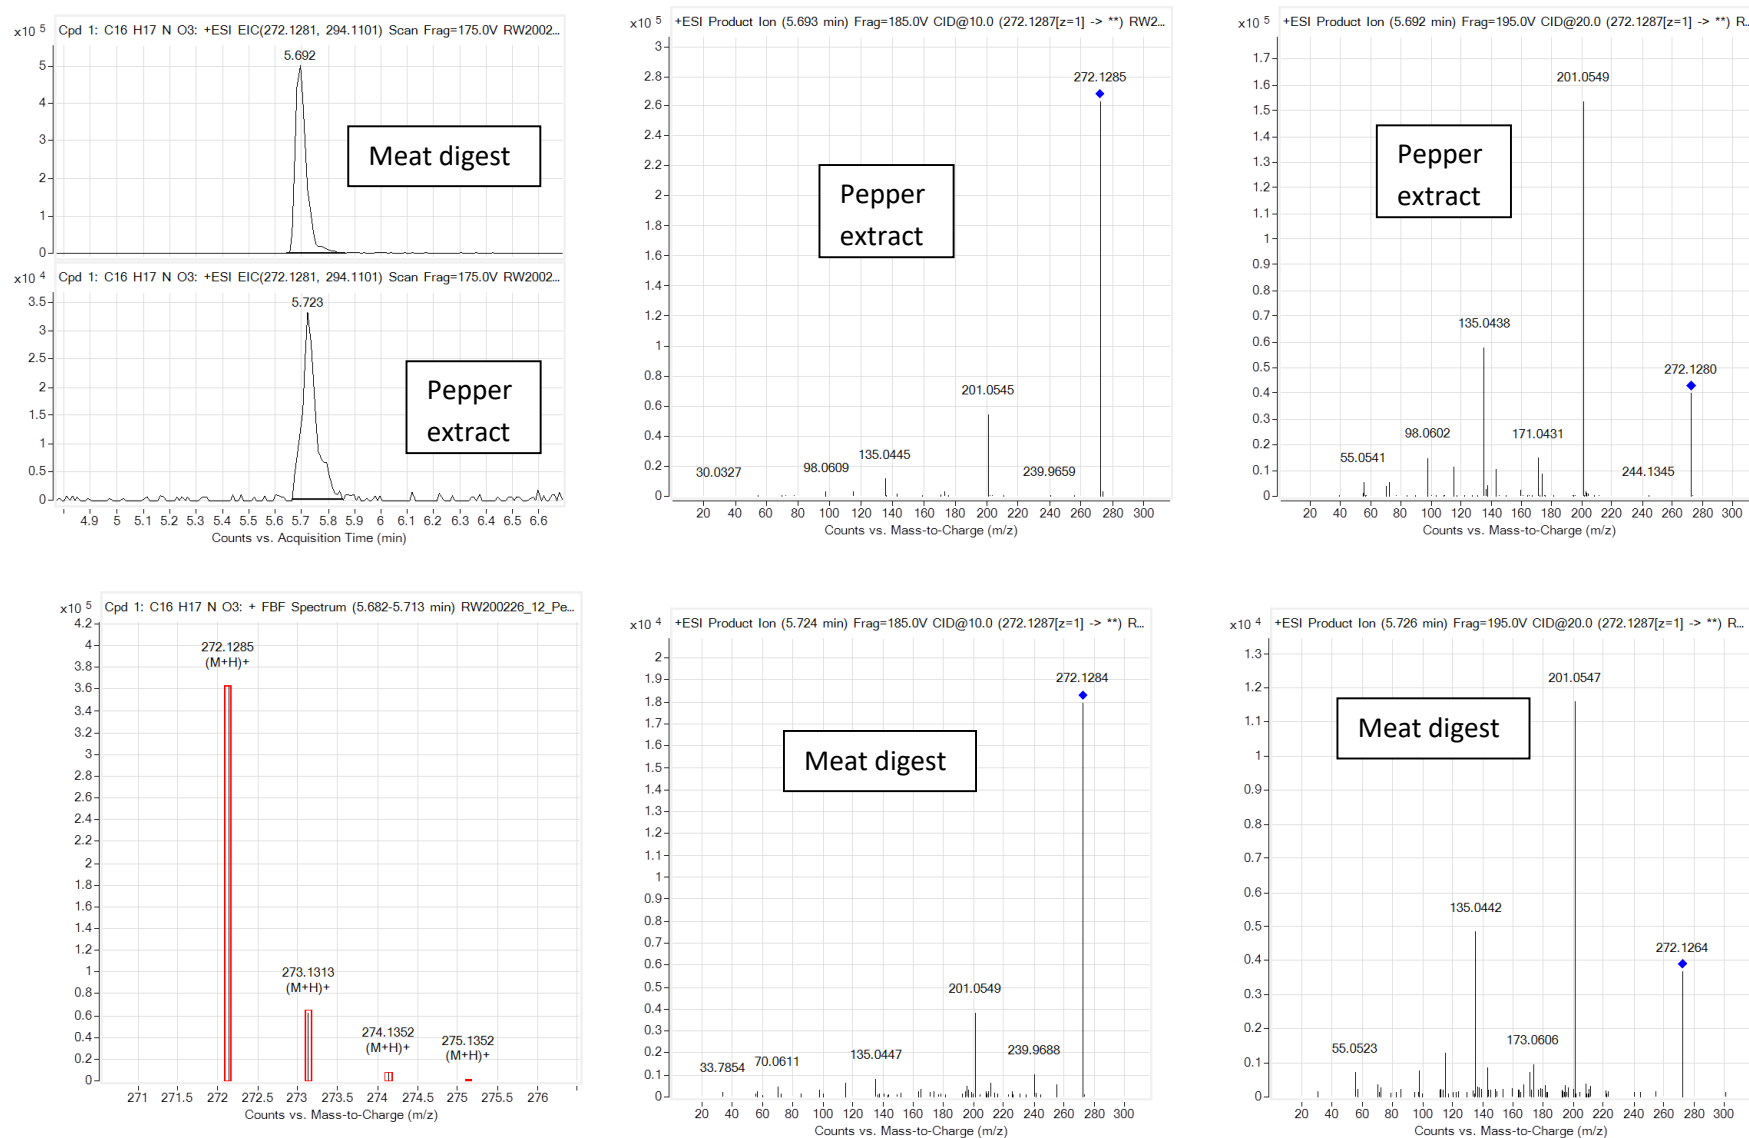



FIGURE S3 : Annotation evidence for Piperanine in fried sausage digest, comparison with compound in black pepper extract.

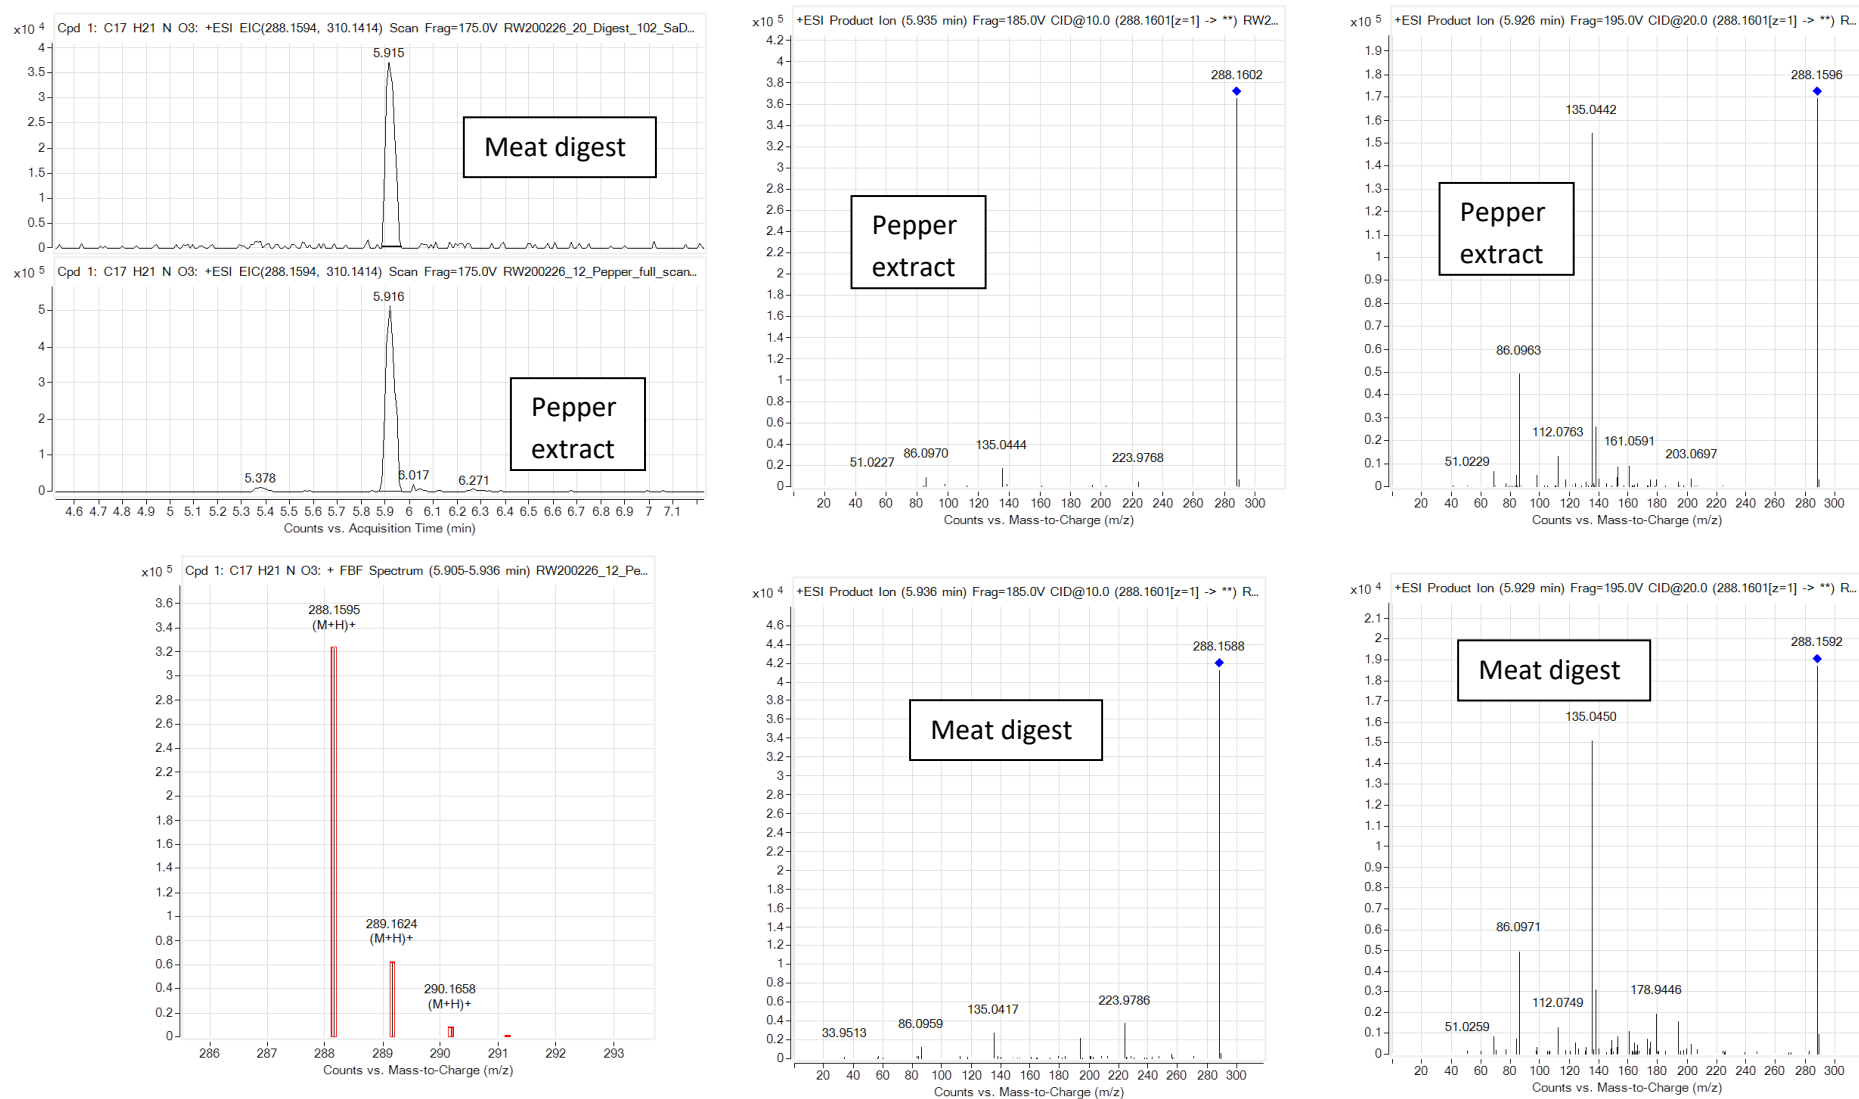

FIGURE S4 : Annotation evidence for Piperine in fried sausage digest, comparison with chemical standard and compound in black pepper extract.

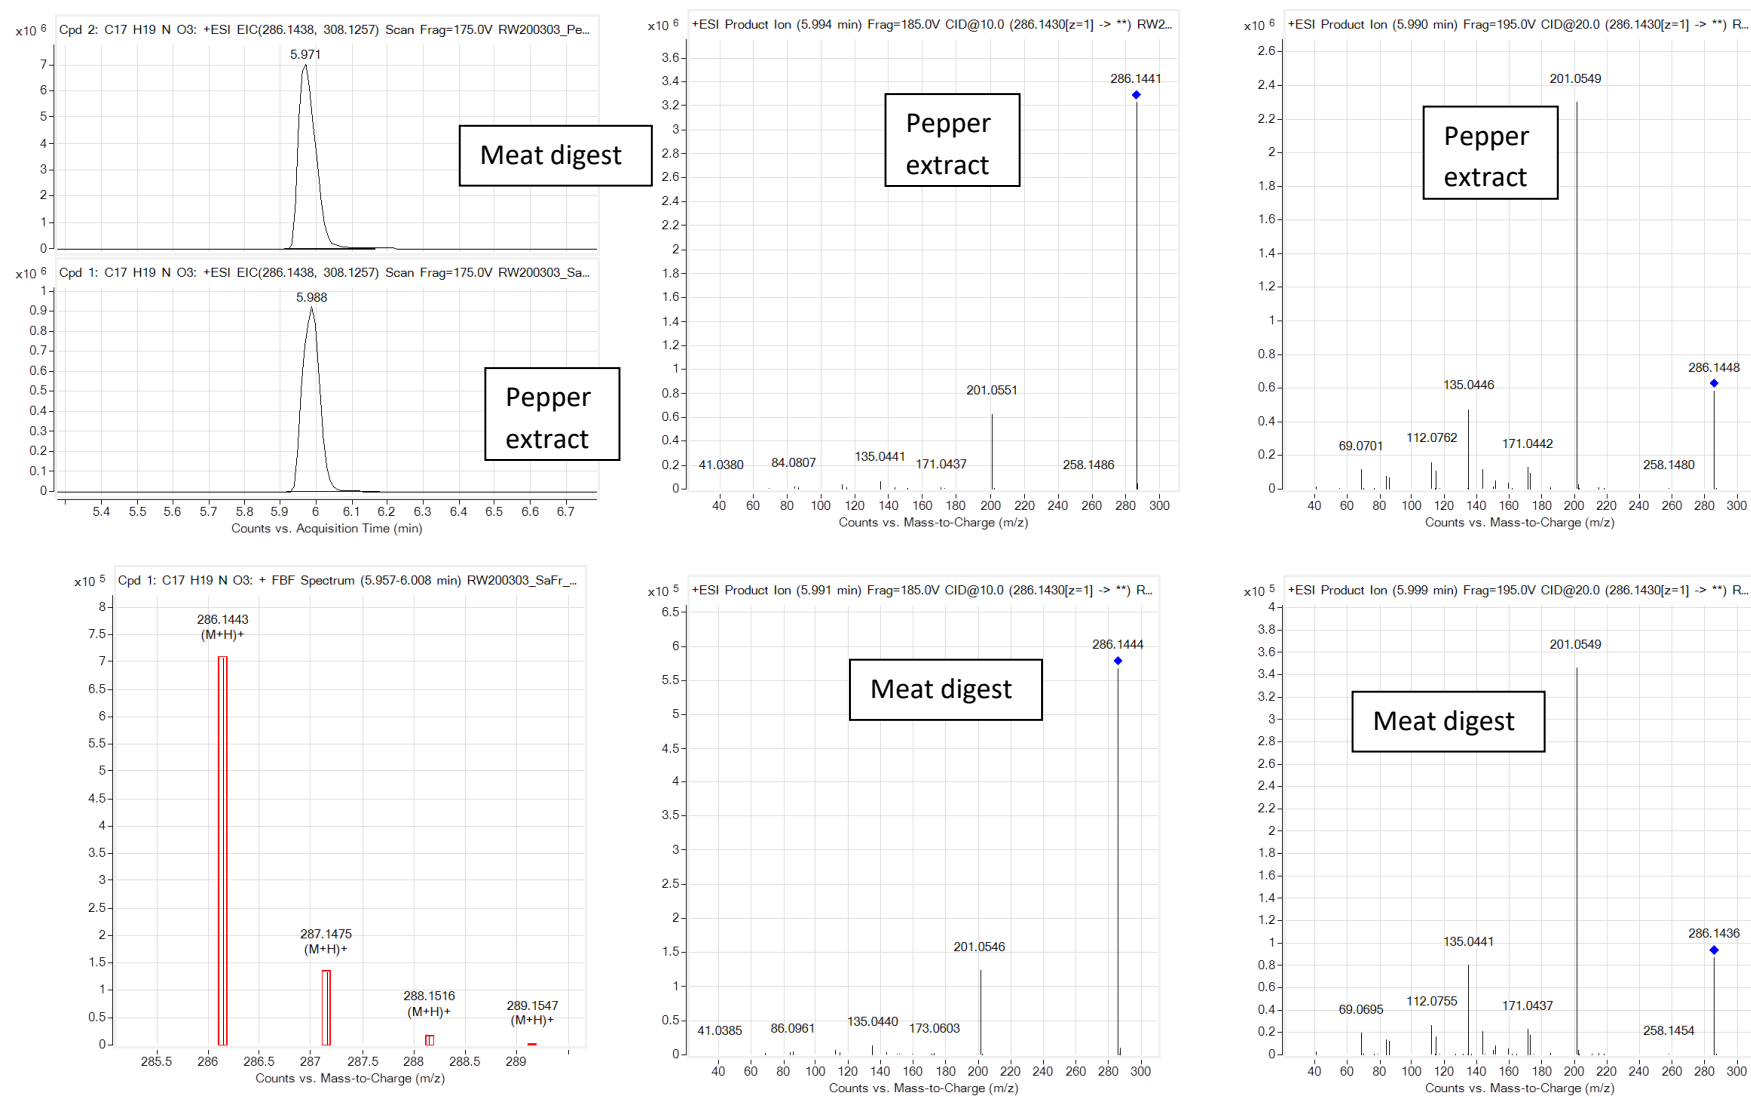

FIGURE S5 : Annotation evidence for Piperettine in fried sausage digest, comparison with compound in black pepper extract.

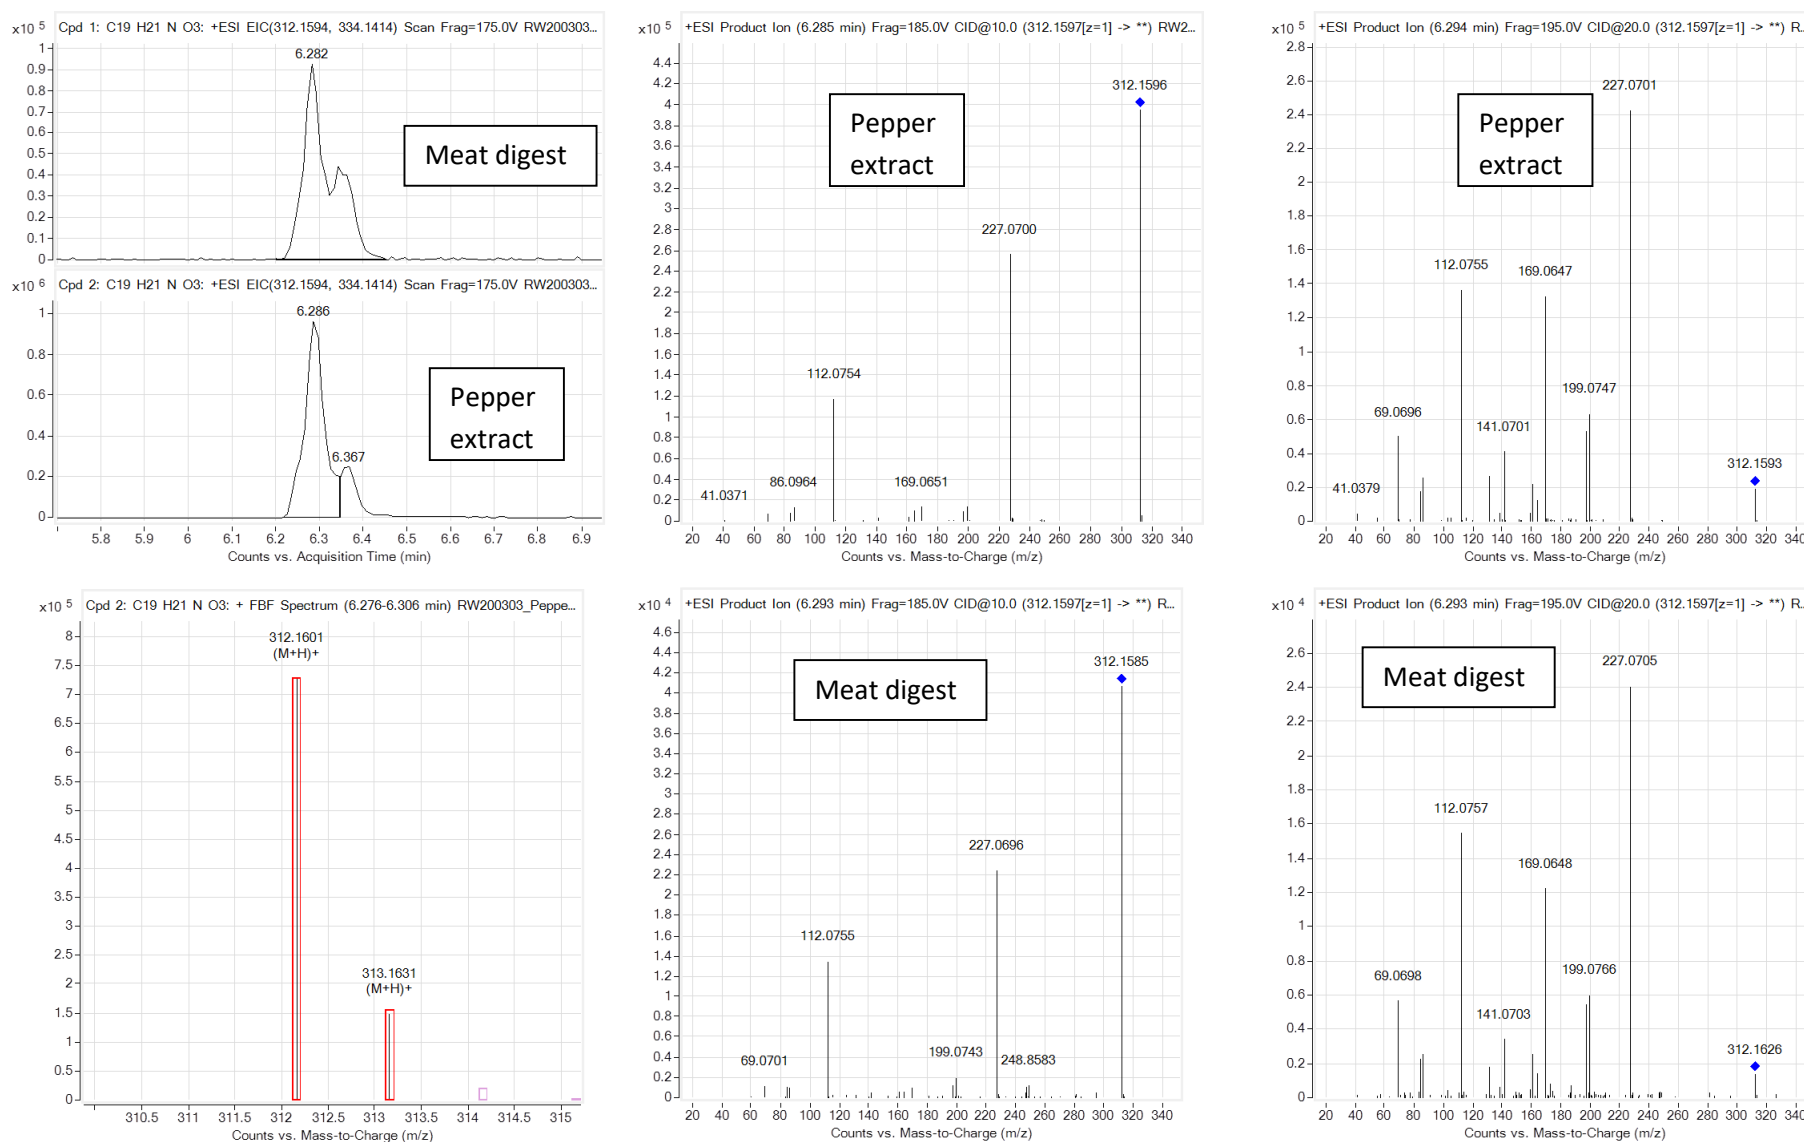

FIGURE S6 : Annotation evidence for Piperdardine in fried sausage digest, comparison with compound in black pepper extract.

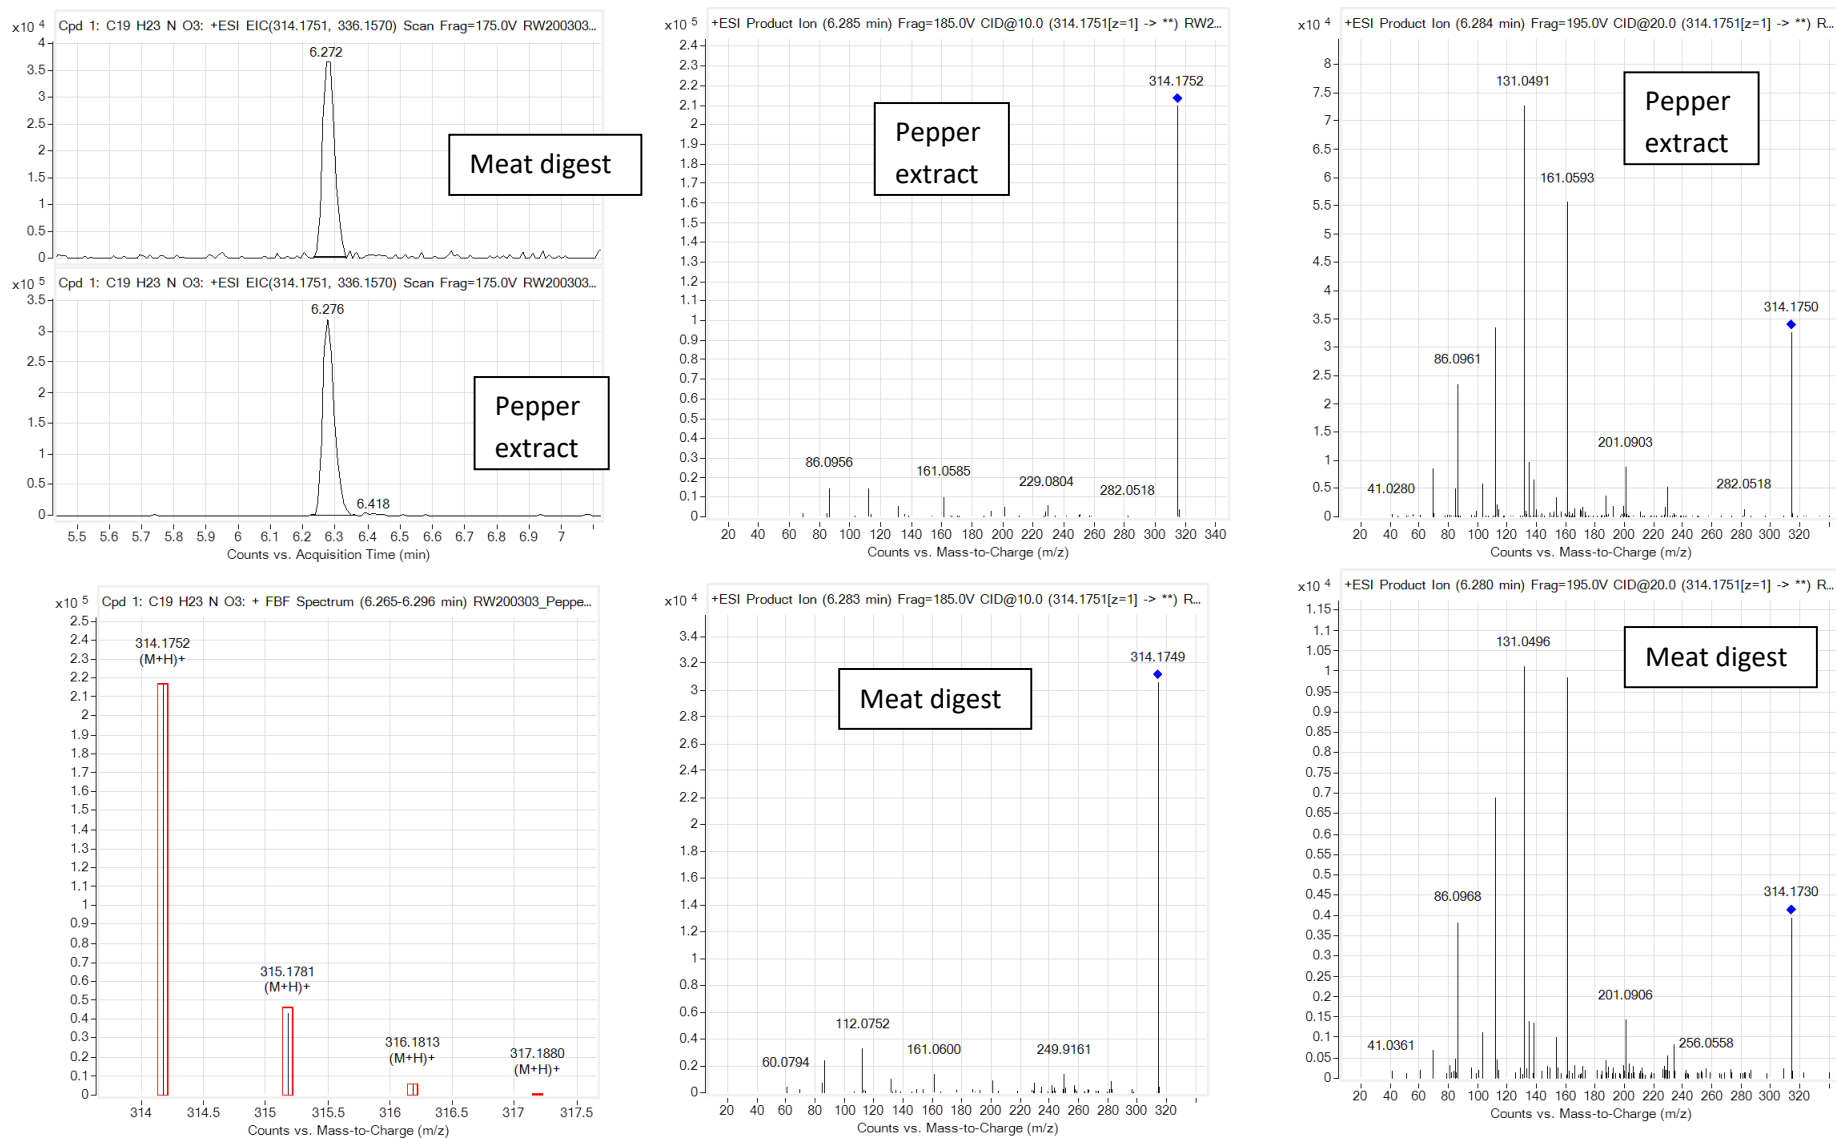

FIGURE S7 : Annotation evidence for pepper compound 2 in fried sausage digest, comparison with compound in black pepper extract.

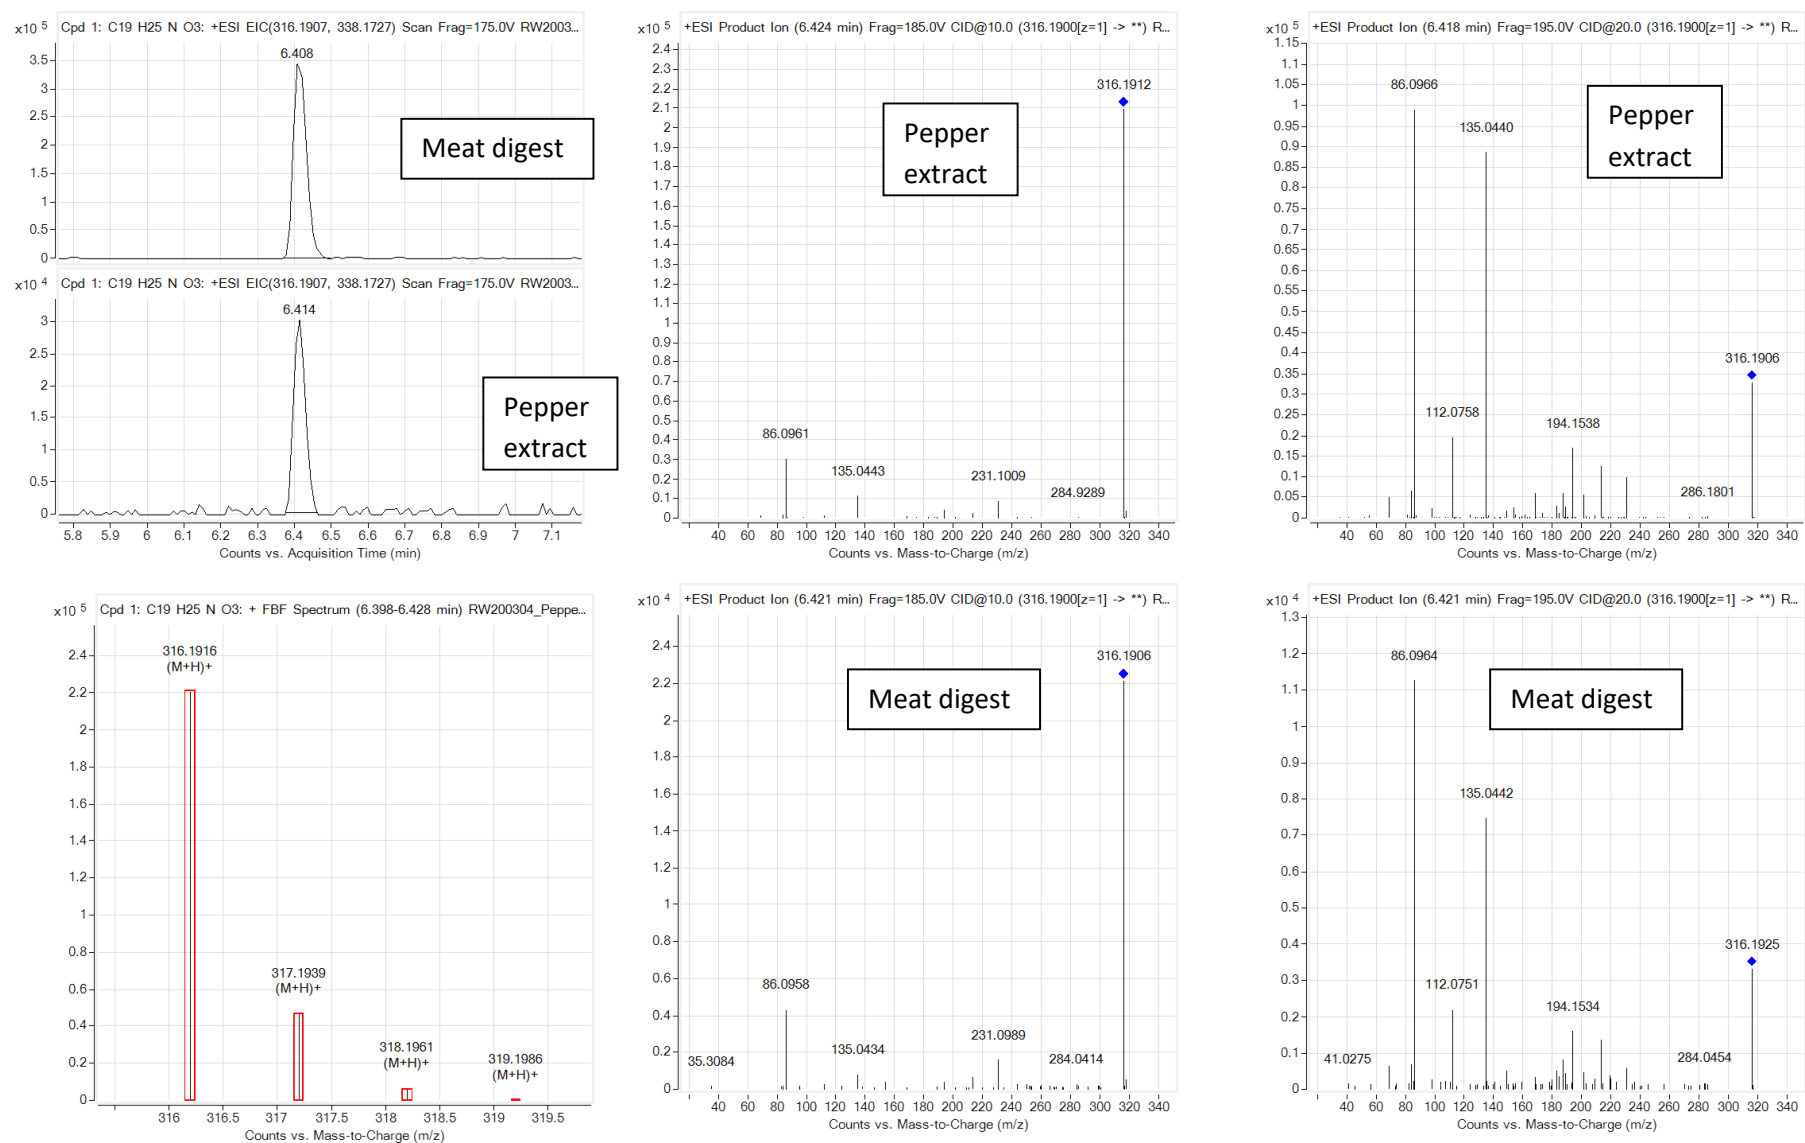

FIGURE S8 : Annotation evidence for pepper compound 3 in fried sausage digest, comparison with compound in black pepper extract.

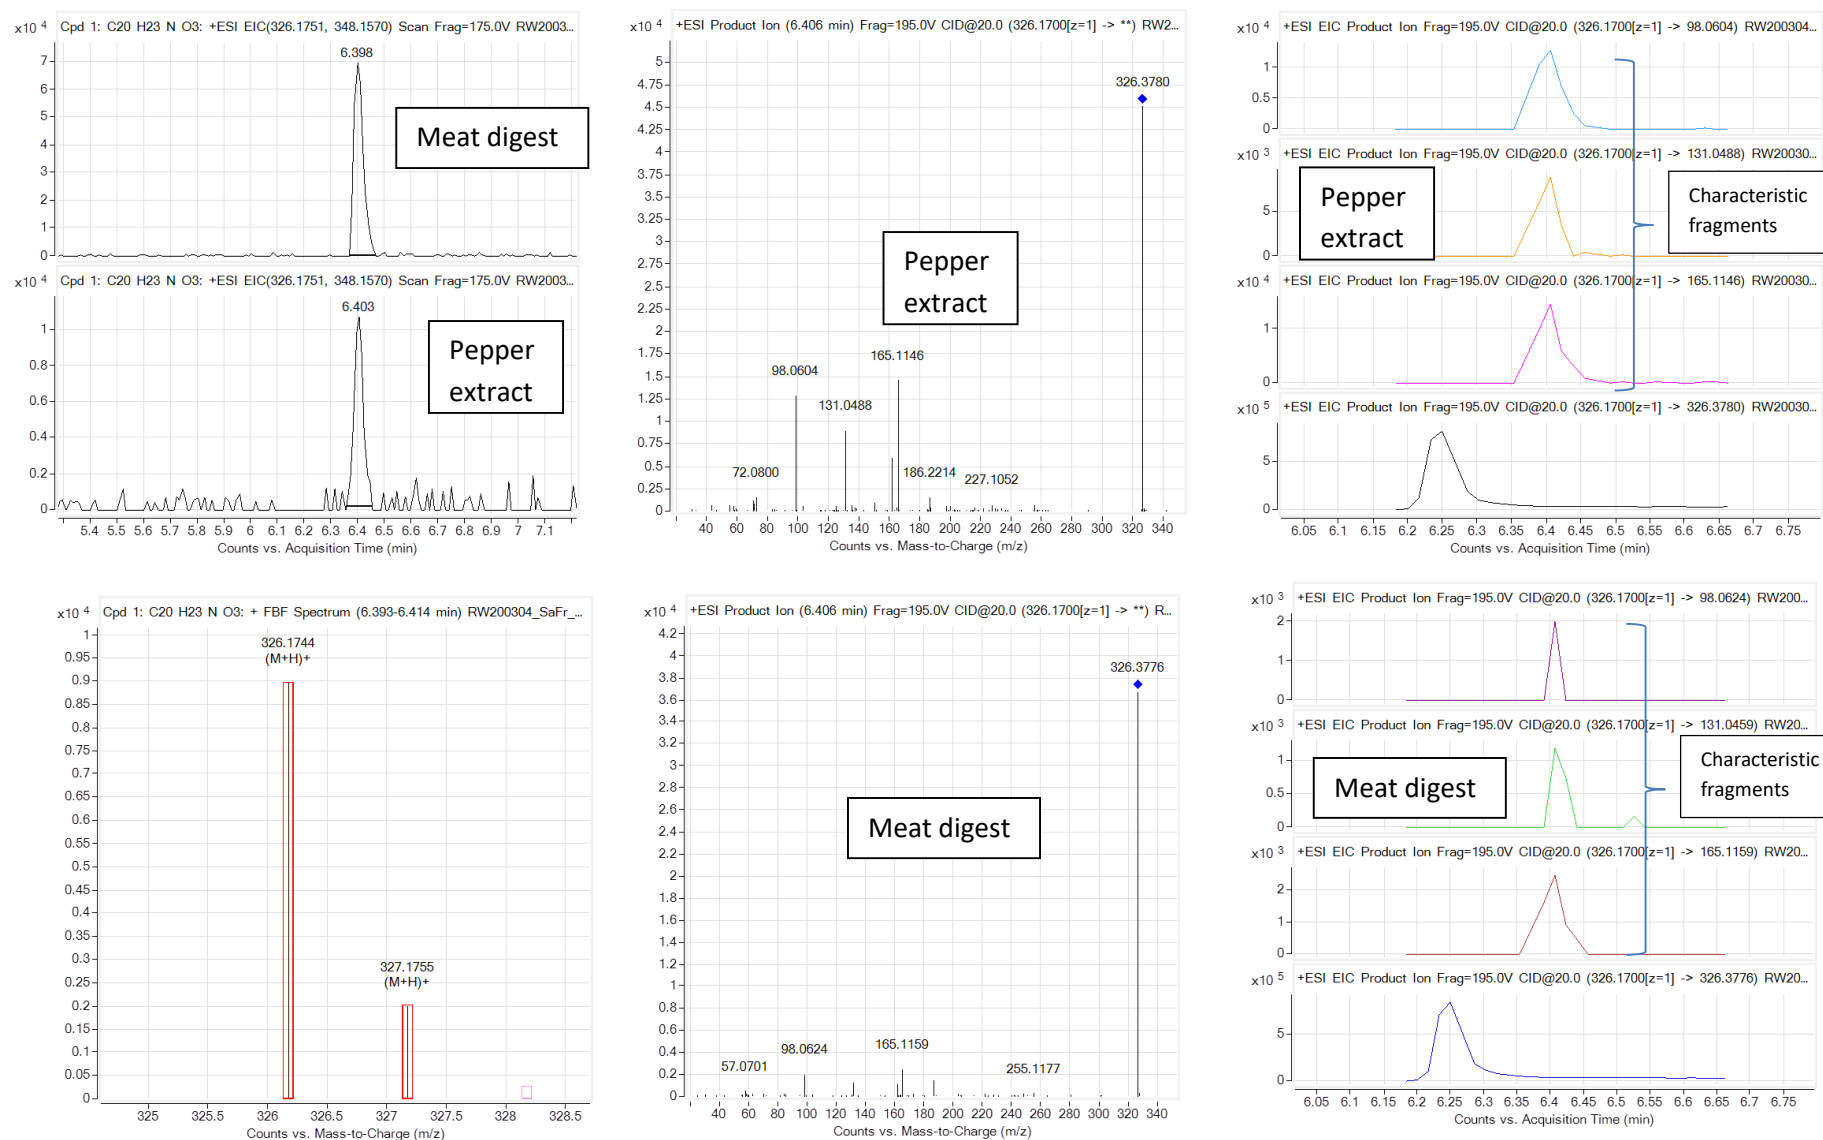

The same characteristic fragments ( $m/z = 98.06$ ,  $m/z = 131.05$ ,  $m/z = 165.12$ ,  $RT = 6.4$  min) are present in both pepper extract and meat digest, but a second compound has been selected for fragmentation ( $m/z = 326.38$ ,  $RT = 6.25$  min) which shows higher intensity and adds noise to the MS/MS spectrum.

FIGURE S9 : Annotation evidence for pepper compound 4 in fried sausage digest, comparison with compound in black pepper extract.

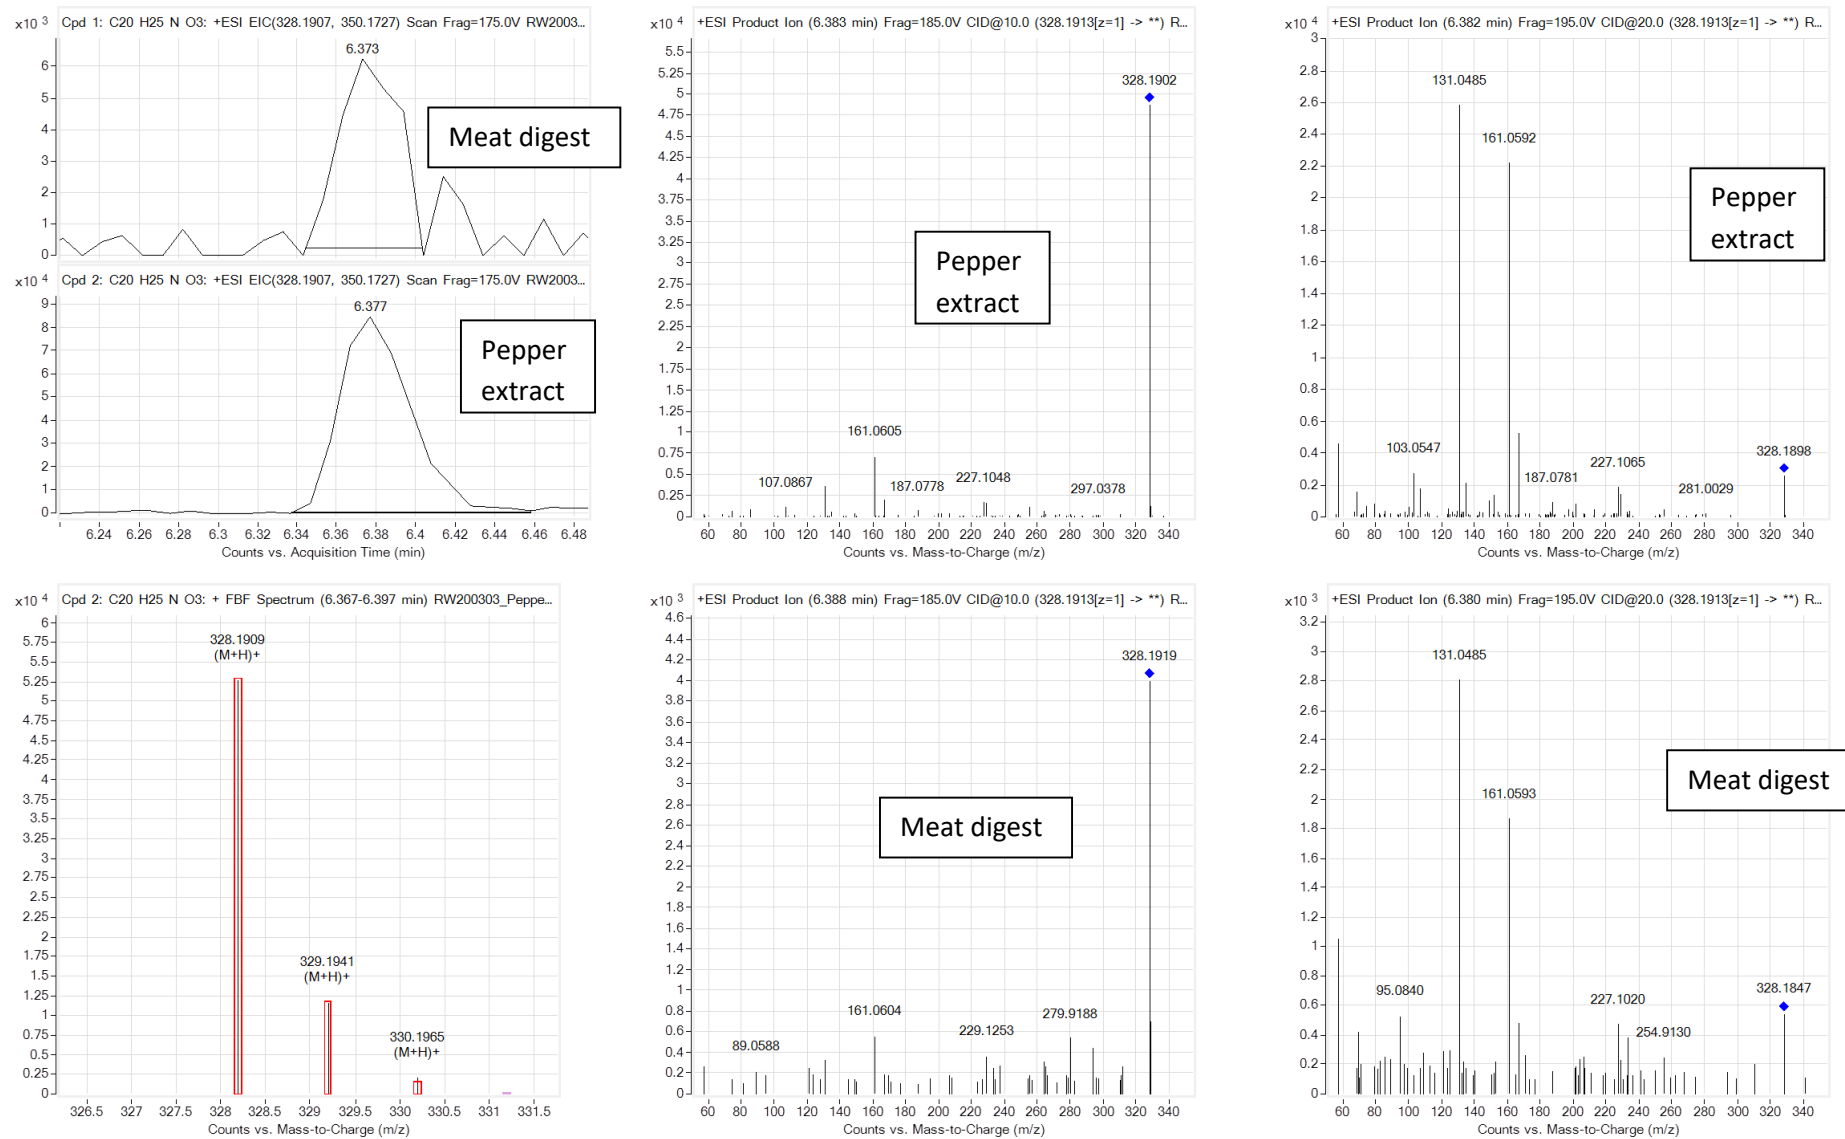

FIGURE S10 : Annotation evidence for pepper compound 5 in fried sausage digest, comparison with compound in black pepper extract.

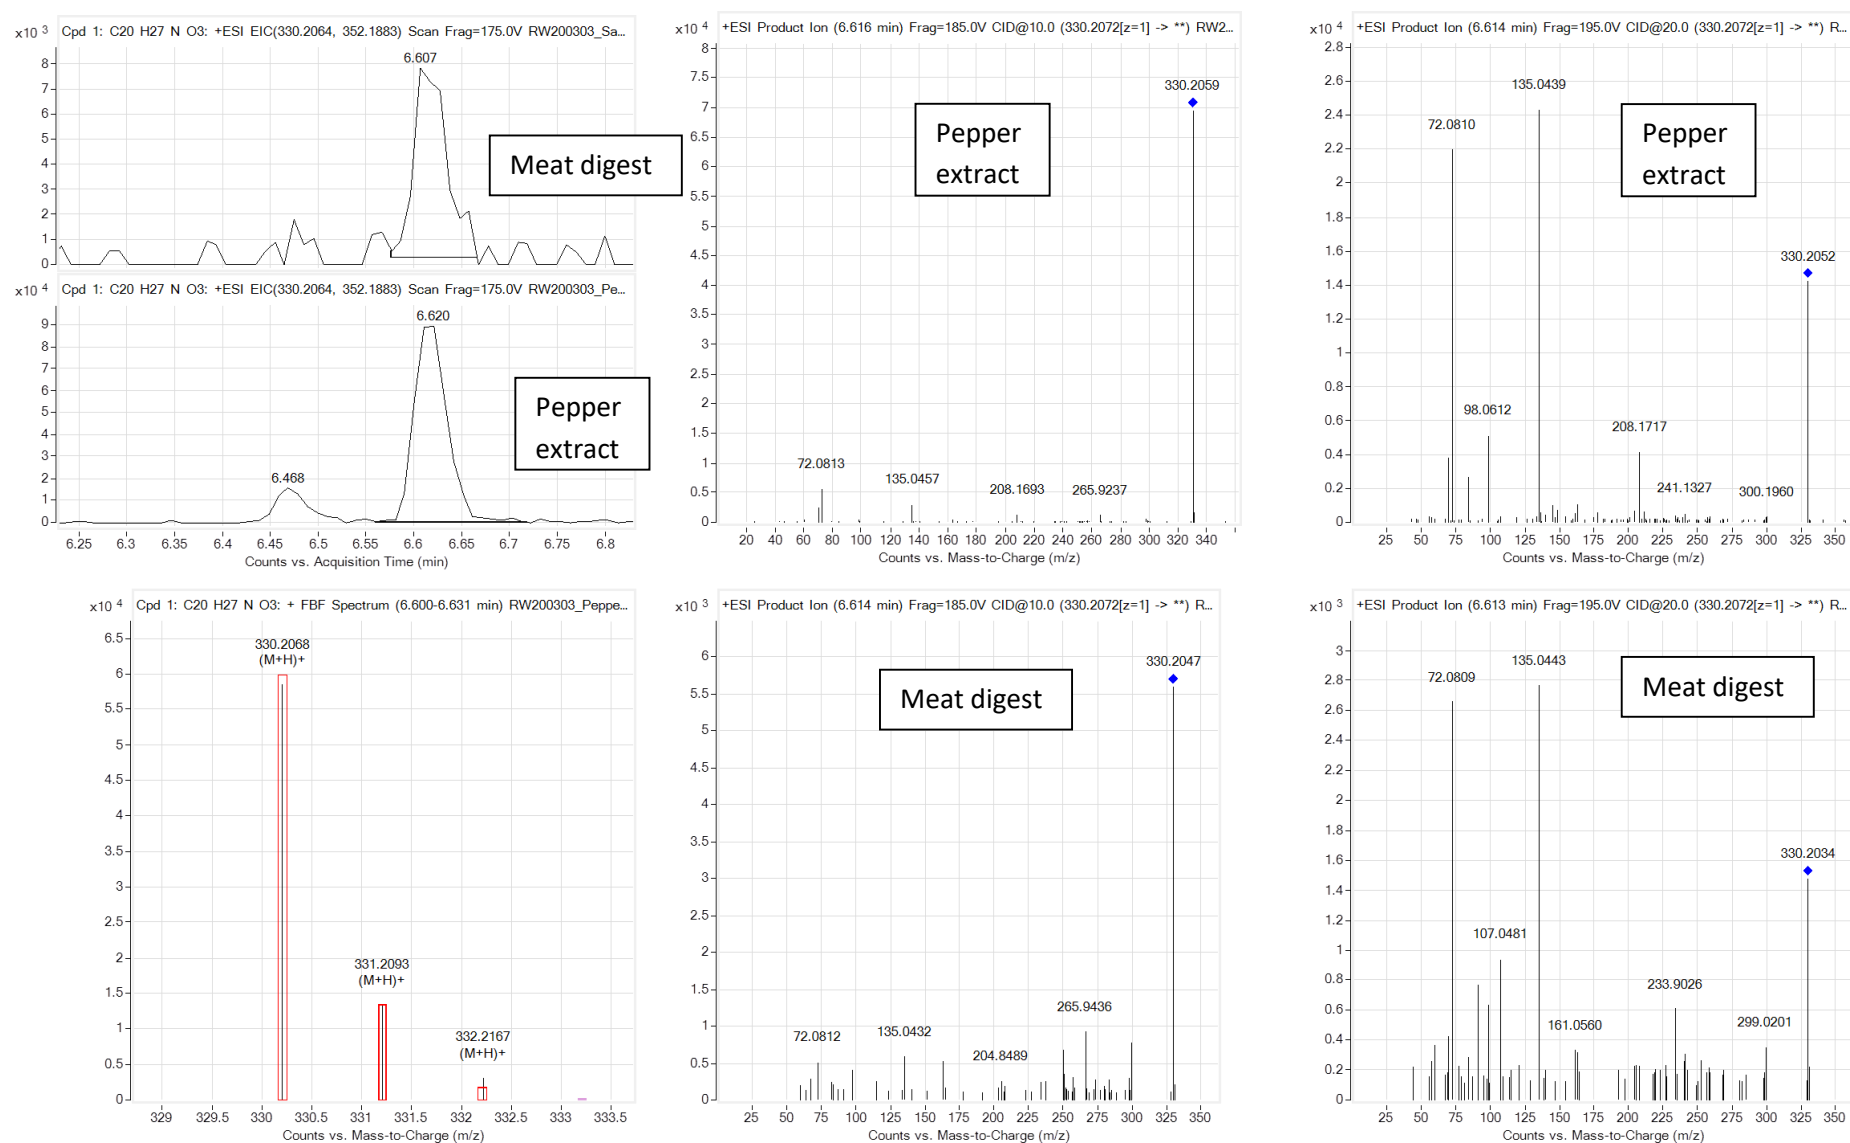



FIGURE S11 : Annotation evidence for pepper compound 6 in fried sausage digest, comparison with compound in black pepper extract.

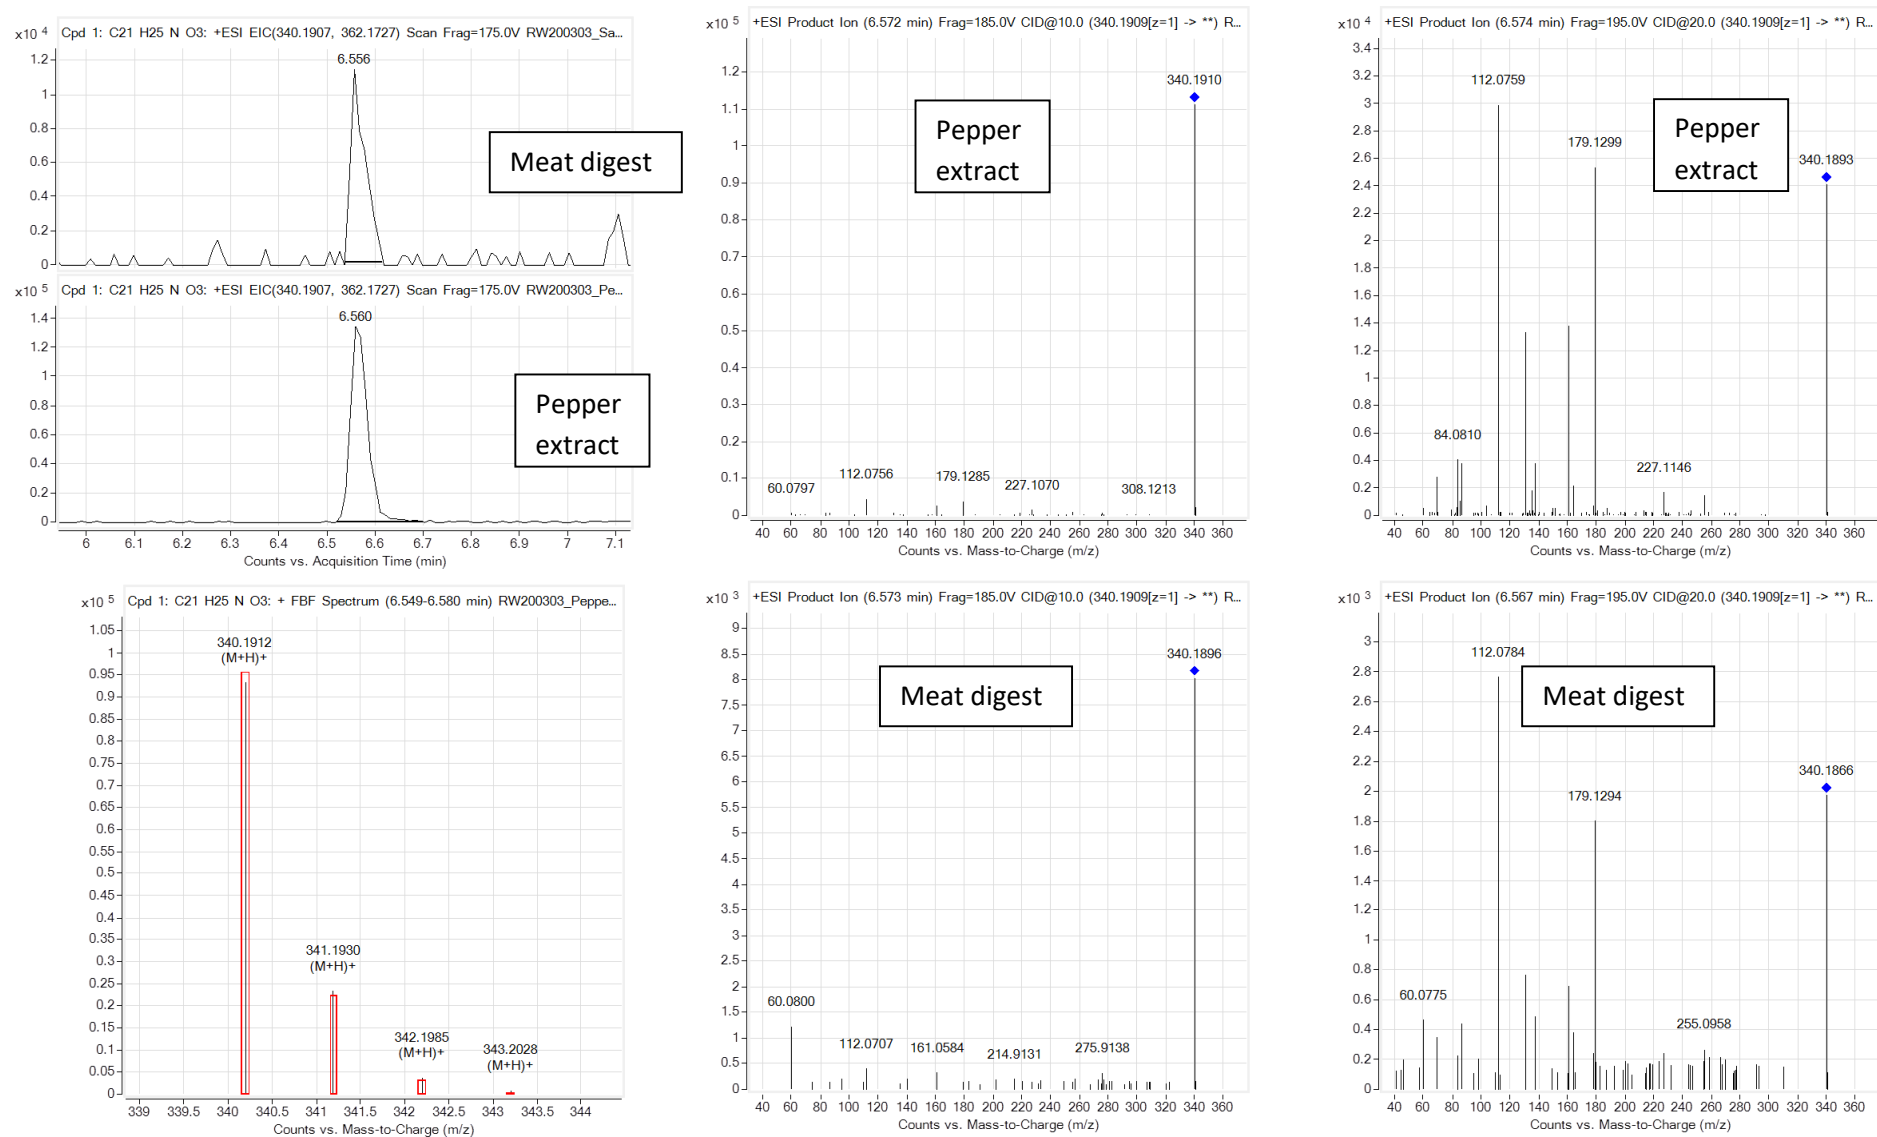

FIGURE S12 : Annotation evidence for pepper compound 7 in fried sausage digest, comparison with compound in black pepper extract.

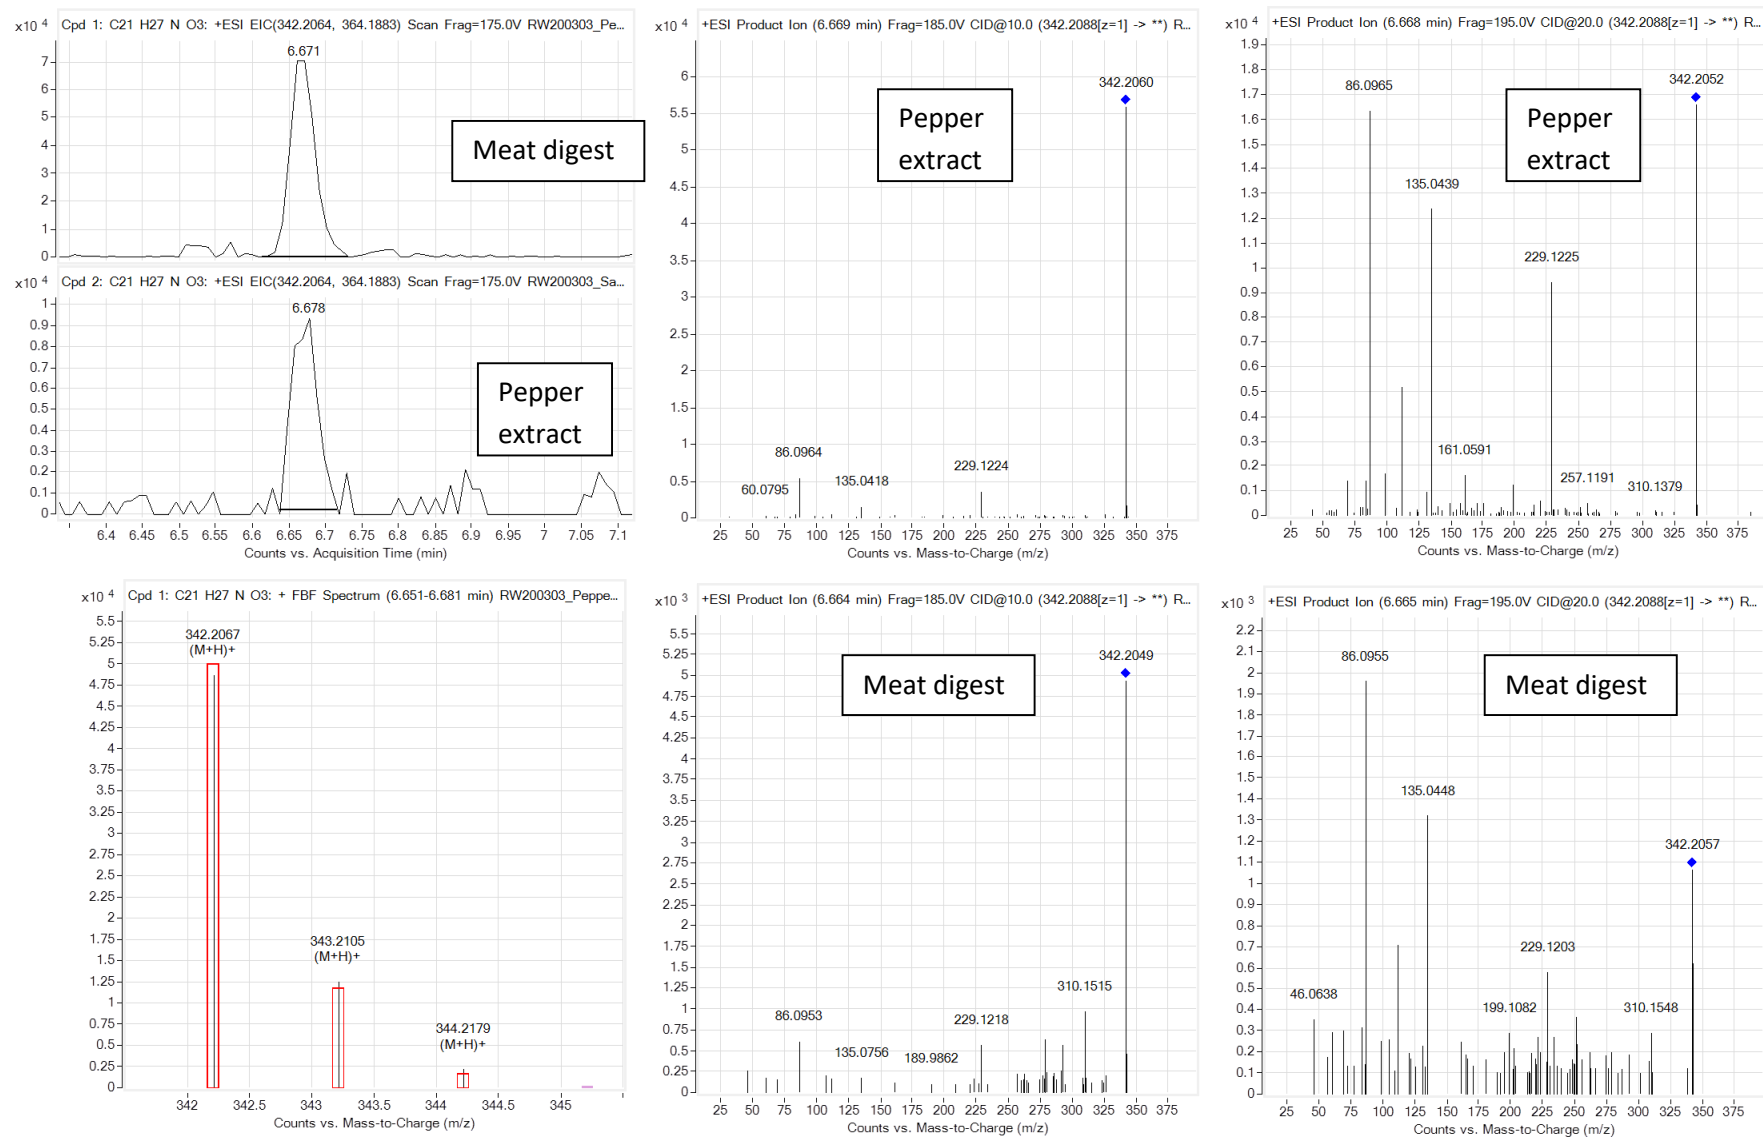

FIGURE S13 : Annotation evidence for pepper compound 8 in fried sausage digest, comparison with compound in black pepper extract.

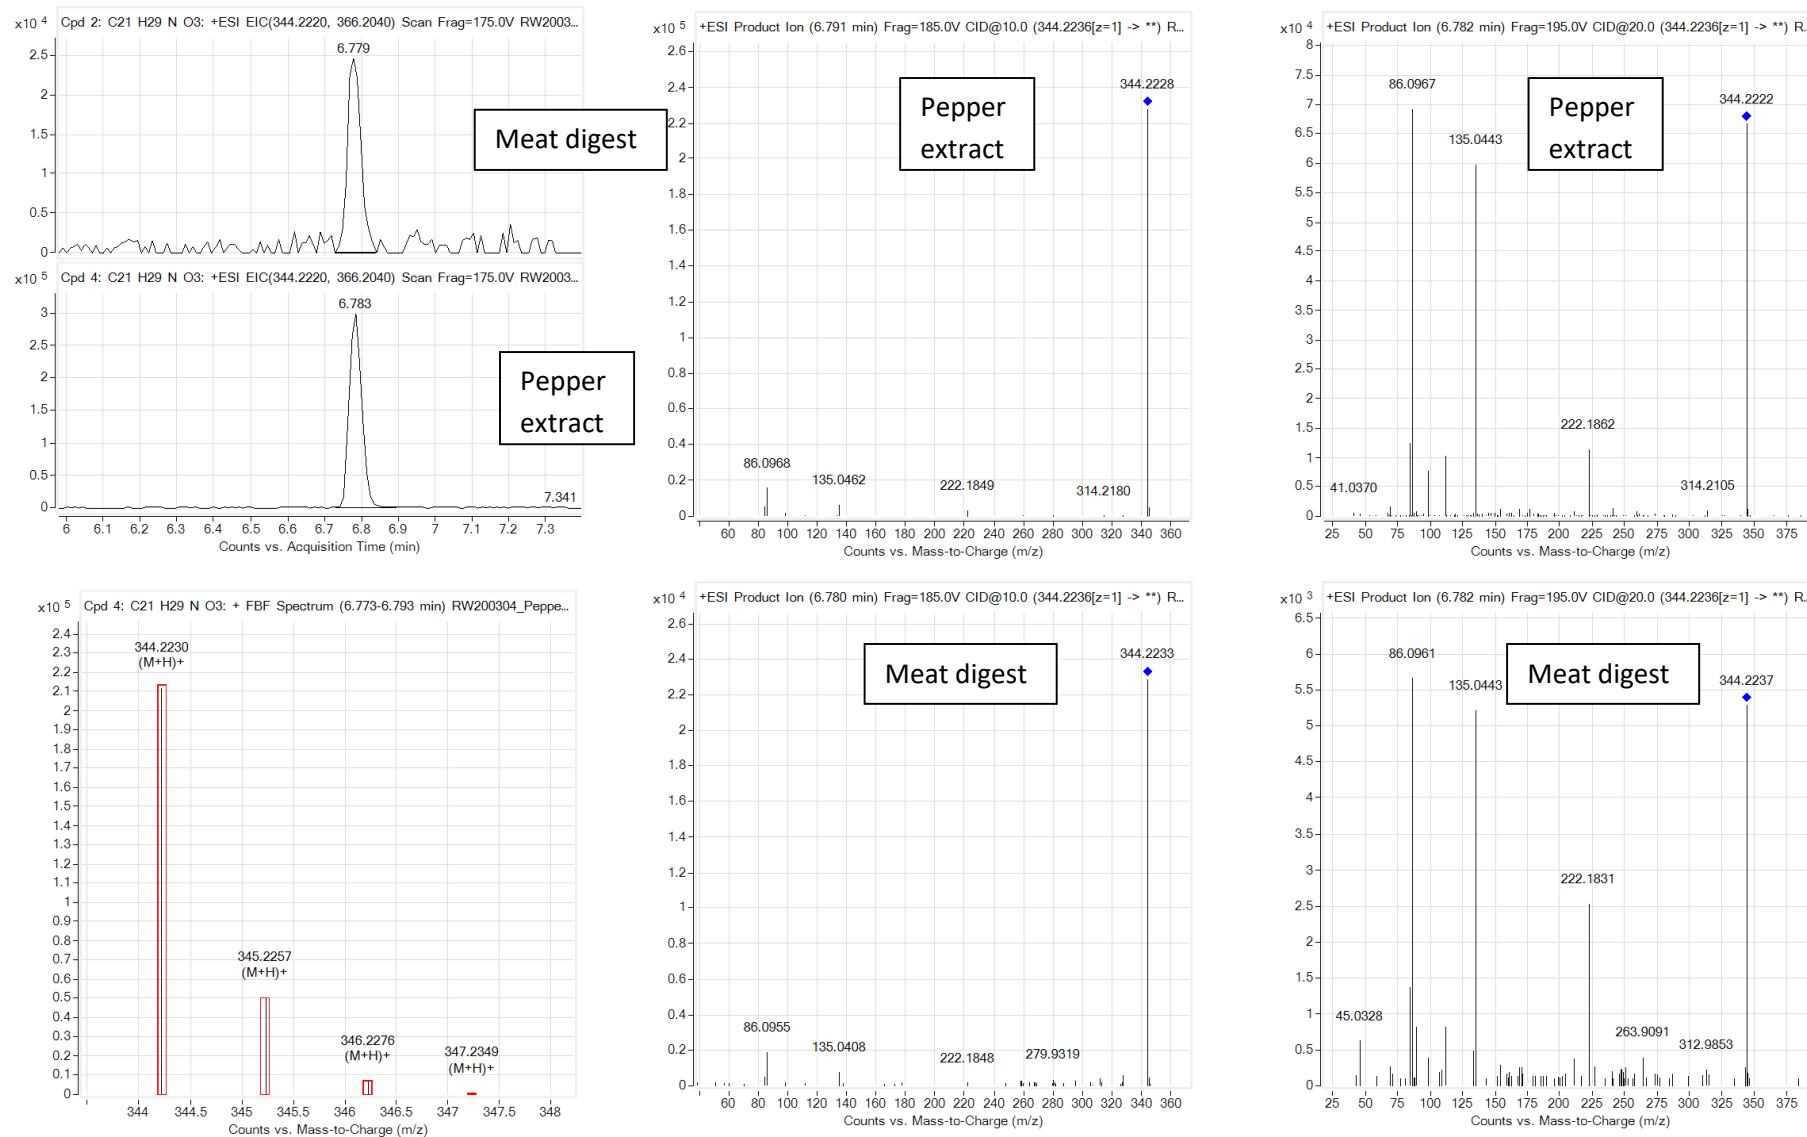

FIGURE S14 : Annotation evidence for piperidine in fried sausage digest, comparison with compound in black pepper extract.

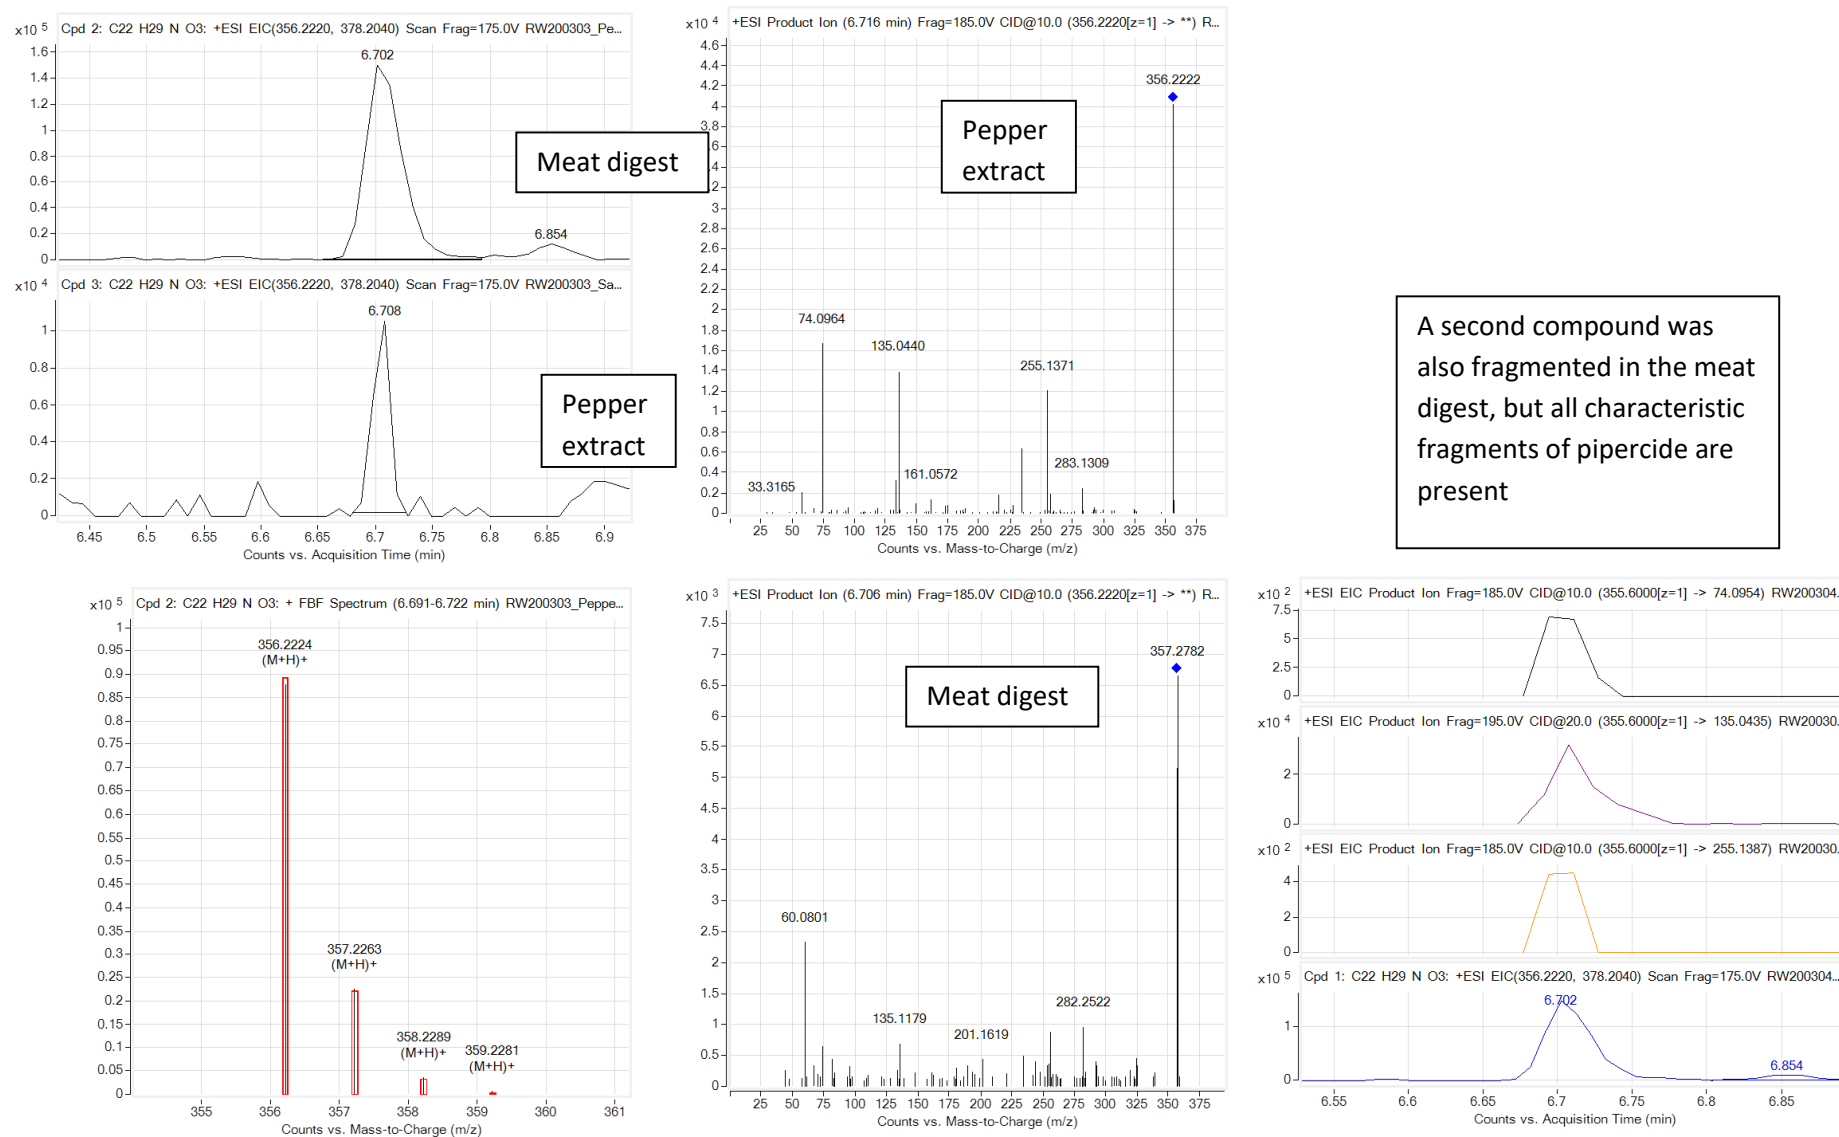

FIGURE S15 : Annotation evidence for phenylalanylisoleucine.

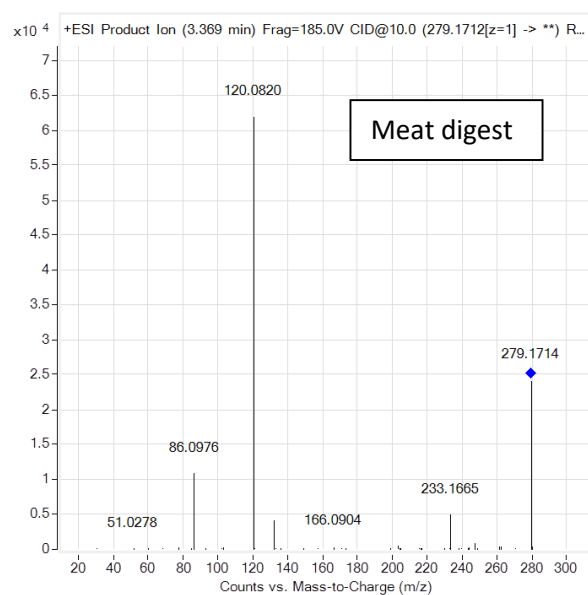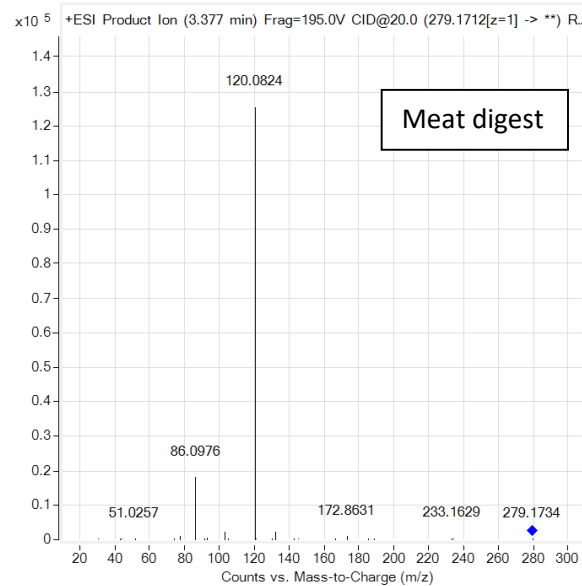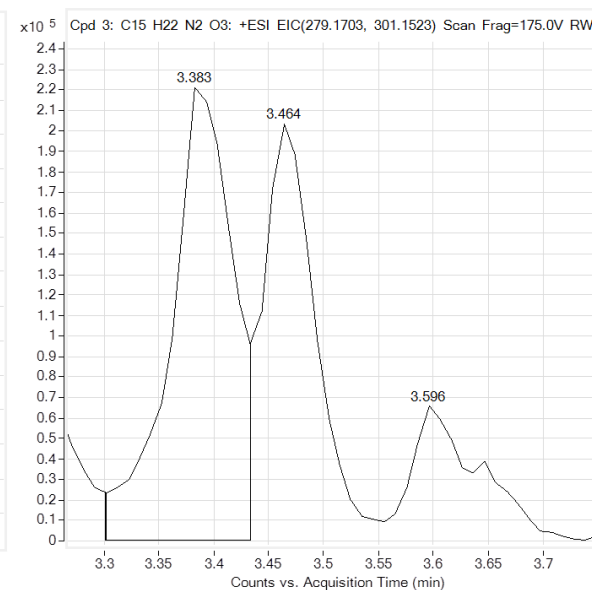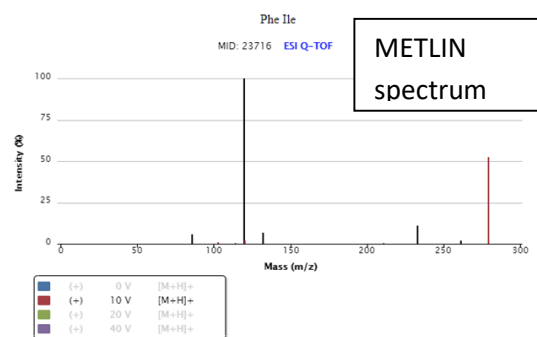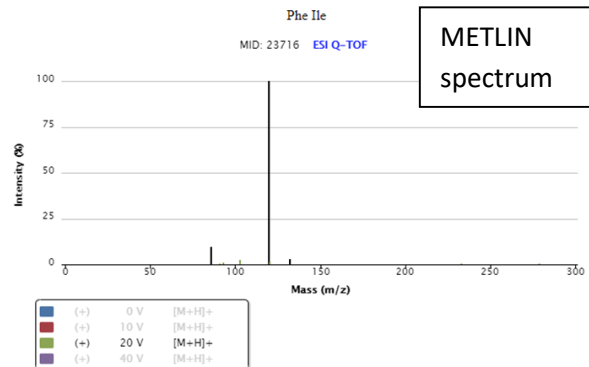

FIGURE S16 : Annotation evidence for  $\gamma$ -aminobutyric acid in fermented sausage digest, comparison with chemical standard.

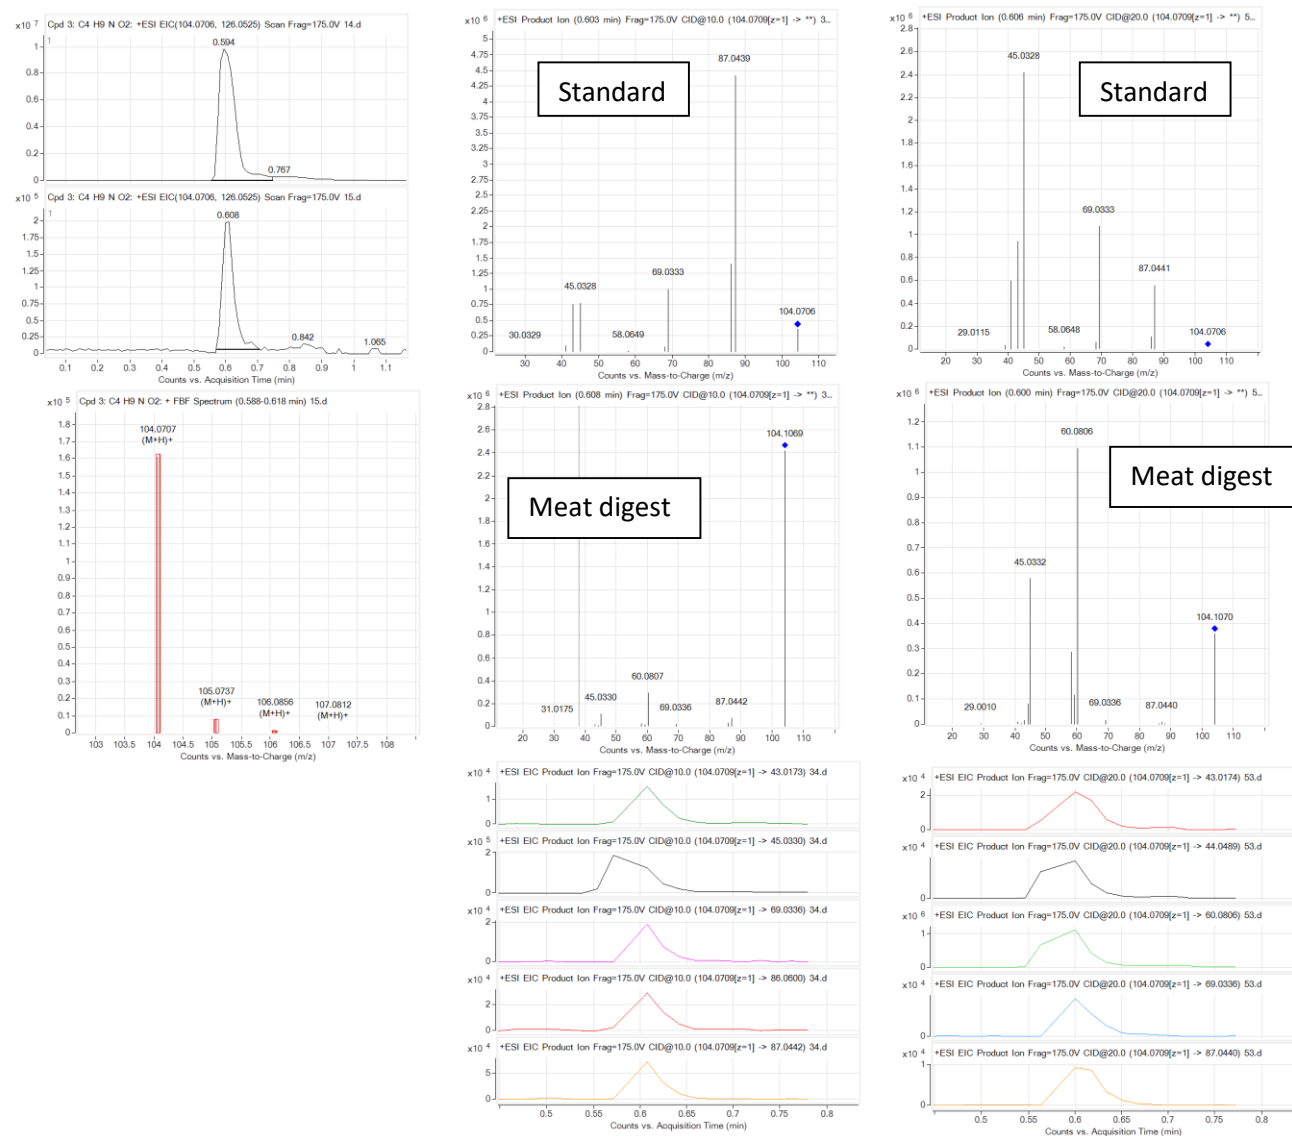

Another ion ( $m/z$  = 104.107) with higher intensity as GABA is also fragmented

All characteristic fragments of GABA are present in low intensities in the meat digest samples

FIGURE S17 : Annotation evidence for histamine in fermented sausage digest, comparison with chemical standard.

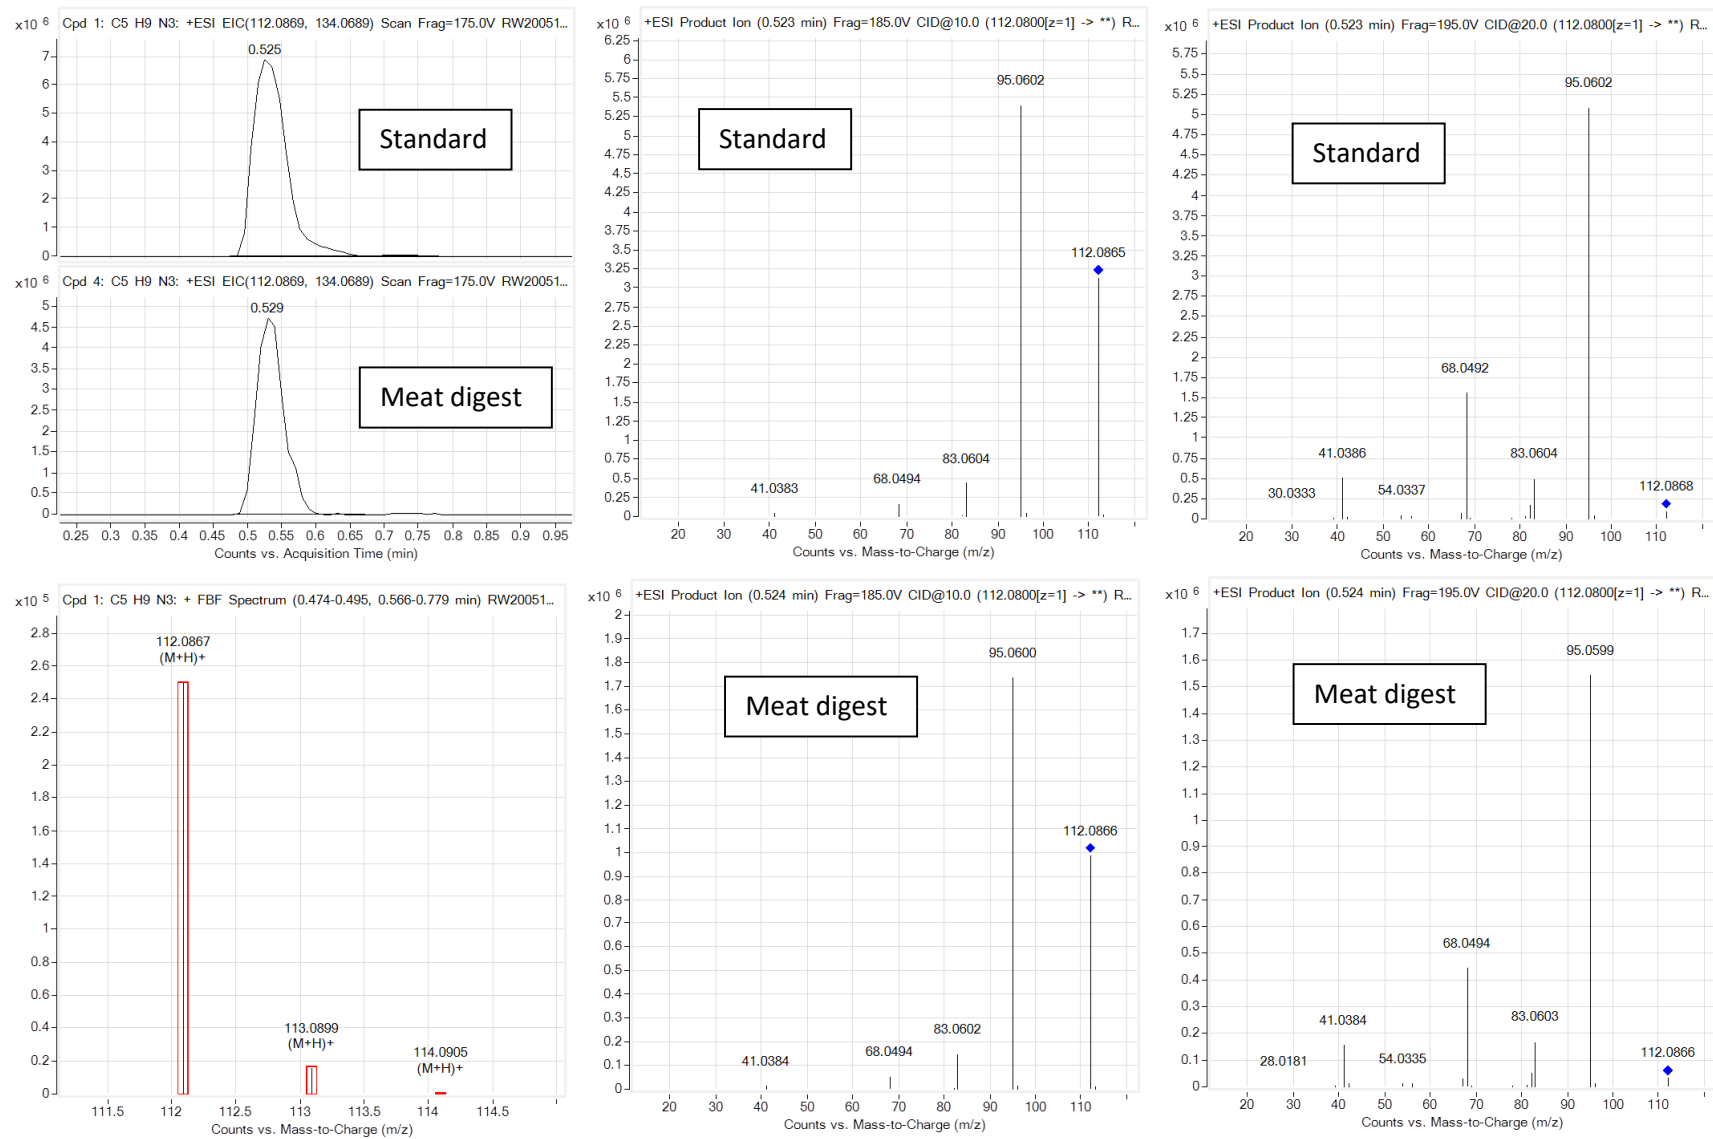

FIGURE S18: Annotation evidence for tyramine in fermented sausage digest, comparison with chemical standard.

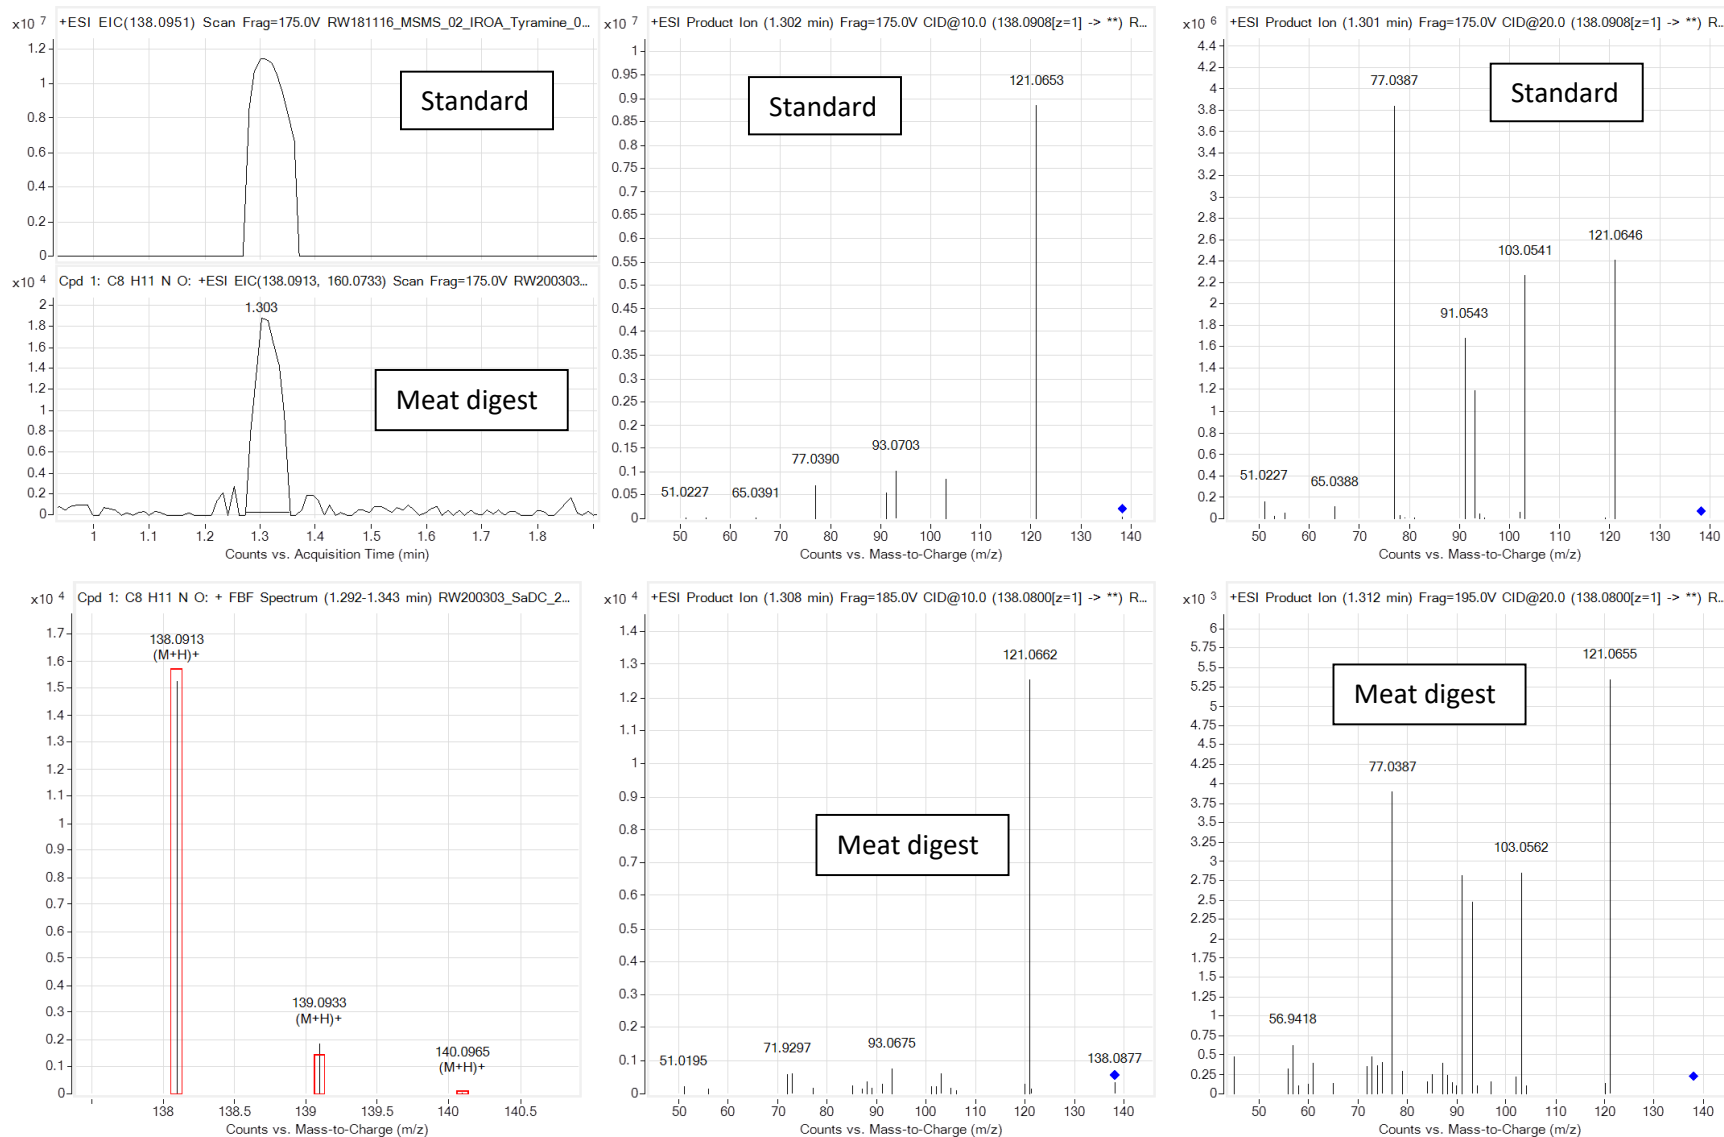



FIGURE S19 : Annotation evidence for tryptamine in fermented sausage digest, comparison with chemical standard.

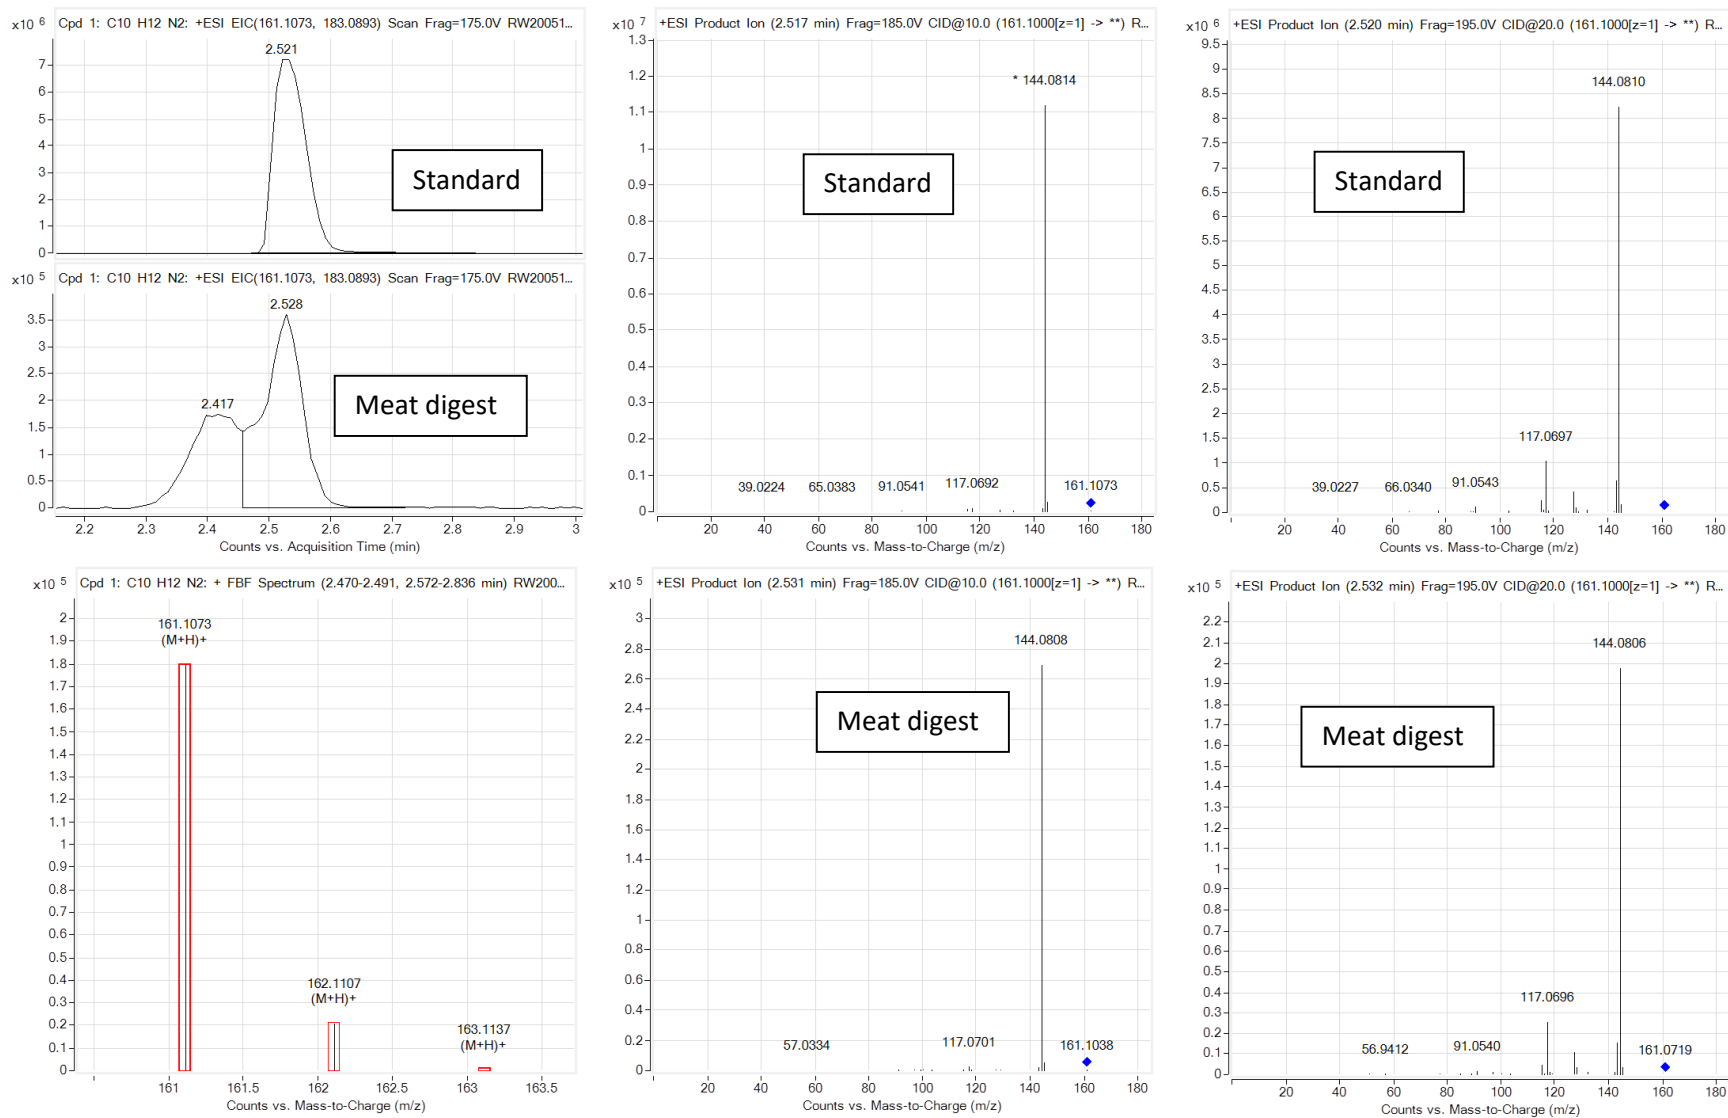

References:

1. Sumner, L.W.; Amberg, A.; Barrett, D.; Beale, M.H.; Beger, R.; Daykin, C.A.; Fan, T.W.-M.; Fiehn, O.; Goodacre, R.; Griffin, J.L.; et al. Proposed minimum reporting standards for chemical analysis Chemical Analysis Working Group (CAWG) Metabolomics Standards Initiative (MSI). *Metabolomics* **2007**, *3*, 211–221, doi:10.1007/s11306-007-0082-2.
2. Liu, H.-L.; Luo, R.; Chen, X.-Q.; Ba, Y.-Y.; Zheng, L.; Guo, W.-W.; Wu, X. Identification and simultaneous quantification of five alkaloids in *Piper longum* L. by HPLC-ESI-MS(n) and UFLC-ESI-MS/MS and their application to *Piper nigrum* L. *Food Chem* **2015**, *177*, 191–196, doi:10.1016/j.foodchem.2015.01.033.
3. Friedman, M.; Levin, C.E.; Lee, S.-U.; Lee, J.-S.; Ohnisi-Kameyama, M.; Kozukue, N. Analysis by HPLC and LC/MS of pungent piperamides in commercial black, white, green, and red whole and ground peppercorns. *J. Agric. Food Chem.* **2008**, *56*, 3028–3036, doi:10.1021/jf703711z.
4. Scott, I.M.; Puniani, E.; Jensen, H.; Livesey, J.F.; Poveda, L.; Sánchez-Vindas, P.; Durst, T.; Arnason, J.T. Analysis of Piperaceae Germplasm by HPLC and LCMS: A Method for Isolating and Identifying Unsaturated Amides from *Piper* spp Extracts. *J. Agric. Food Chem.* **2005**, *53*, 1907–1913, doi:10.1021/jf048305a.
5. Li, K.; Zhu, W.; Fu, Q.; Ke, Y.; Jin, Y.; Liang, X. Purification of amide alkaloids from *Piper longum* L. using preparative two-dimensional normal-phase liquid chromatography × reversed-phase liquid chromatography. *Analyst* **2013**, *138*, 3313–3320, doi:10.1039/C3AN00016H.
